# Supplementary material for: Neutrophil-to-lymphocyte ratio as a predictor of mortality in intensive care unit patients: a retrospective analysis of the Medical Information Mart for Intensive Care III Database
Source: PubMed Central journal article supplement — BMJ Open. 2021 Nov 11;11(11):e053548. doi: 10.1136/bmjopen-2021-053548 (PMC8587351; doi:10.1136/bmjopen-2021-053548), 2021-11-11
Supplement: bmjopen-2021-053548.draft_revisions.pdf [file bmjopen-2021-053548.draft_revisions.pdf]

# BMJ Open

BMJ Open is committed to open peer review. As part of this commitment we make the peer review history of every article we publish publicly available.

When an article is published we post the peer reviewers' comments and the authors' responses online. We also post the versions of the paper that were used during peer review. These are the versions that the peer review comments apply to.

The versions of the paper that follow are the versions that were submitted during the peer review process. They are not the versions of record or the final published versions. They should not be cited or distributed as the published version of this manuscript.

BMJ Open is an open access journal and the full, final, typeset and author-corrected version of record of the manuscript is available on our site with no access controls, subscription charges or pay-per-view fees (<http://bmjopen.bmj.com>).

If you have any questions on BMJ Open's open peer review process please email [info.bmjopen@bmj.com](mailto:info.bmjopen@bmj.com)

# BMJ Open

## Neutrophil-to-Lymphocyte Ratio as a Predictor of Mortality in Intensive Care Unit Patients: A Retrospective Analysis of the Medical Information Mart for Intensive Care III Database

|                               |                                                                                                                                                                                                                                                                                                                                                                                                                                                                                                                                                                                                                                                                                                                                                                                                                                                                                                                                                                                                                                                 |
|-------------------------------|-------------------------------------------------------------------------------------------------------------------------------------------------------------------------------------------------------------------------------------------------------------------------------------------------------------------------------------------------------------------------------------------------------------------------------------------------------------------------------------------------------------------------------------------------------------------------------------------------------------------------------------------------------------------------------------------------------------------------------------------------------------------------------------------------------------------------------------------------------------------------------------------------------------------------------------------------------------------------------------------------------------------------------------------------|
| Journal:                      | <i>BMJ Open</i>                                                                                                                                                                                                                                                                                                                                                                                                                                                                                                                                                                                                                                                                                                                                                                                                                                                                                                                                                                                                                                 |
| Manuscript ID                 | bmjopen-2021-053548                                                                                                                                                                                                                                                                                                                                                                                                                                                                                                                                                                                                                                                                                                                                                                                                                                                                                                                                                                                                                             |
| Article Type:                 | Original research                                                                                                                                                                                                                                                                                                                                                                                                                                                                                                                                                                                                                                                                                                                                                                                                                                                                                                                                                                                                                               |
| Date Submitted by the Author: | 19-May-2021                                                                                                                                                                                                                                                                                                                                                                                                                                                                                                                                                                                                                                                                                                                                                                                                                                                                                                                                                                                                                                     |
| Complete List of Authors:     | <p>Wu, Xie; Chinese Academy of Medical Sciences &amp; Peking Union Medical College Fuwai Hospital, Department of Anesthesiology</p> <p>Luo, Qipeng; Peking University Third Hospital, Department of Pain Medicine</p> <p>Su, Zhanhao; Chinese Academy of Medical Sciences &amp; Peking Union Medical College Fuwai Hospital, Department of pediatric cardiac surgery</p> <p>Li, Yanan; Chinese Academy of Medical Sciences &amp; Peking Union Medical College Fuwai Hospital, Department of Anesthesiology</p> <p>Wang, Hongbai; Chinese Academy of Medical Sciences &amp; Peking Union Medical College Fuwai Hospital, Anaesthesiology</p> <p>Liu, Qiao; Chinese Academy of Medical Sciences &amp; Peking Union Medical College Fuwai Hospital, Department of Anesthesiology</p> <p>Yuan, Su; Chinese Academy of Medical Sciences &amp; Peking Union Medical College Fuwai Hospital, Anesthesiology</p> <p>Yan, Fuxia; Chinese Academy of Medical Sciences &amp; Peking Union Medical College Fuwai Hospital, Department of Anesthesiology</p> |
| Keywords:                     | Adult intensive & critical care < INTENSIVE & CRITICAL CARE, Adverse events < THERAPEUTICS, Risk management < HEALTH SERVICES ADMINISTRATION & MANAGEMENT                                                                                                                                                                                                                                                                                                                                                                                                                                                                                                                                                                                                                                                                                                                                                                                                                                                                                       |
|                               |                                                                                                                                                                                                                                                                                                                                                                                                                                                                                                                                                                                                                                                                                                                                                                                                                                                                                                                                                                                                                                                 |

SCHOLARONE™  
Manuscripts

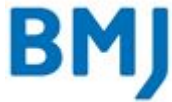

I, the Submitting Author has the right to grant and does grant on behalf of all authors of the Work (as defined in the below author licence), an exclusive licence and/or a non-exclusive licence for contributions from authors who are: i) UK Crown employees; ii) where BMJ has agreed a CC-BY licence shall apply, and/or iii) in accordance with the terms applicable for US Federal Government officers or employees acting as part of their official duties; on a worldwide, perpetual, irrevocable, royalty-free basis to BMJ Publishing Group Ltd ("BMJ") its licensees and where the relevant Journal is co-owned by BMJ to the co-owners of the Journal, to publish the Work in this journal and any other BMJ products and to exploit all rights, as set out in our [licence](#).

The Submitting Author accepts and understands that any supply made under these terms is made by BMJ to the Submitting Author unless you are acting as an employee on behalf of your employer or a postgraduate student of an affiliated institution which is paying any applicable article publishing charge ("APC") for Open Access articles. Where the Submitting Author wishes to make the Work available on an Open Access basis (and intends to pay the relevant APC), the terms of reuse of such Open Access shall be governed by a Creative Commons licence – details of these licences and which [Creative Commons](#) licence will apply to this Work are set out in our licence referred to above.

Other than as permitted in any relevant BMJ Author's Self Archiving Policies, I confirm this Work has not been accepted for publication elsewhere, is not being considered for publication elsewhere and does not duplicate material already published. I confirm all authors consent to publication of this Work and authorise the granting of this licence.

1  
2  
3  
4 **Neutrophil-to-Lymphocyte Ratio as a Predictor of Mortality in Intensive Care Unit**  
5  
6 **Patients: A Retrospective Analysis of the Medical Information Mart for Intensive**  
7  
8 **Care III Database**  
9

10  
11  
12 Xie Wu, M.D.<sup>1</sup>; Qipeng Luo, M.D.<sup>2</sup>; Zhanhao Su, M.D.<sup>3</sup>; Yinan Li, M.D.<sup>1</sup>; Hongbai Wang,  
13  
14 M.D.<sup>1</sup>; Qiao Liu, M.D.<sup>1</sup>; Su Yuan, M.D.<sup>1</sup>; and Fuxia Yan, M.D., Ph.D.<sup>1</sup>  
15  
16

17  
18  
19 <sup>1</sup> Department of Anesthesiology, Fuwai Hospital, National Center of Cardiovascular  
20  
21 Diseases, Chinese Academy of Medical Sciences and Peking Union Medical College,  
22  
23 Beijing, China  
24  
25

26 <sup>2</sup> Department of Pain Medicine, Peking University Third Hospital, Beijing, China  
27

28 <sup>3</sup> Center for Pediatric Cardiac Surgery, Fuwai Hospital, National Center of Cardiovascular  
29  
30 Diseases, Chinese Academy of Medical Sciences and Peking Union Medical College,  
31  
32 Beijing, China  
33  
34

35  
36  
37 **Corresponding Author:**  
38

39  
40 Fuxia Yan, M.D., Ph.D.

41  
42 Department of Anesthesiology, Fuwai Hospital, Chinese Academy of Medical Sciences and  
43  
44 Peking Union Medical College  
45

46  
47 167 Beilishi Road, Xicheng District, Beijing 100037, China  
48

49 E-mail: [yanfuxia@sina.com](mailto:yanfuxia@sina.com)  
50  
51  
52  
53  
54  
55  
56  
57

1  
2  
3  
4 **Disclaimers:** The views expressed in the manuscript are our own and not an official  
5  
6 position of the institution or funder.  
7  
8  
9

10  
11 **Word count:** 2,653  
12  
13

14 **Number of figures and tables:** Tables (04), Figures (01)  
15  
16

### 17 **Funding**

18  
19  
20  
21 This work was supported by the National Nature Science Foundation of China, grant  
22  
23 number 81870070, and the Innovative Foundation for Graduate Students at Peking Union  
24  
25 Medical College, grant number 2019-1002-78.  
26  
27  
28  
29  
30  
31  
32

### 33 **Competing interests**

34  
35 None declared.  
36  
37  
38  
39  
40  
41  
42  
43  
44  
45  
46  
47  
48  
49  
50  
51  
52  
53  
54  
55  
56  
57  
58  
59  
60

## Abstract

**Objectives:** Identifying high-risk patients in the intensive care unit (ICU) is important given the high mortality rate. However, existing scoring systems lack easily accessible, low-cost, and effective inflammatory markers. We aimed to identify inflammatory markers in routine blood tests to predict mortality in ICU patients and evaluate their predictive power.

**Design:** Retrospective cross-sectional study.

**Setting:** Single secondary care centre.

**Participants:** We analysed data from the Medical Information Mart for Intensive Care III database. A total of 21,822 ICU patients were enrolled and divided into survival and death groups based on in-hospital mortality.

**Primary and secondary outcome measures:** The predictive values of potential inflammatory markers were evaluated and compared using receiver operating characteristic curve analysis. After identifying the neutrophil-to-lymphocyte ratio (NLR) as having the best predictive ability, patients were re-divided into low ( $\leq 1$ ), medium (1–6), and high ( $> 6$ ) NLR groups. Univariate and multivariate logistic regression analyses were performed to evaluate the association between the NLR and mortality. The area under the curve (AUC), net reclassification improvement (NRI), and integrated discrimination improvement (IDI) were used to assess whether incorporating the NLR could improve the predictive power of existing scoring systems.

1  
2  
3  
4 **Results:** The NLR had the best predictive ability (AUC: 0.609;  $p < 0.001$ ). In-hospital  
5 mortality rates were significantly higher in the low (odds ratio [OR]: 2.09; 95% confidence  
6 interval [CI]: 1.64–2.66) and high (OR: 1.64; 95% CI: 1.50–1.80) NLR groups than in the  
7 medium NLR group. Adding the NLR to the Simplified Acute Physiology Score II  
8 improved the AUC from 0.789 to 0.798, with an NRI and IDI of 16.64% and 0.27%,  
9 respectively.  
10  
11  
12  
13  
14  
15  
16  
17  
18

19 **Conclusions:** The NLR predicted mortality in ICU patients well. Both low and high NLRs  
20 were associated with elevated mortality rates. Including the NLR may improve the  
21 predictive power of the Simplified Acute Physiology Score II.  
22  
23  
24  
25  
26  
27

#### 28 **Strengths and limitations of this study**

29  
30

- 31 • This study included a large sample size and avoided selection bias by inclusion of all  
32 ICU patients.  
33
- 34 • This study noticed that the mortality rate was also elevated in patients with a low  
35 NLR.  
36
- 37 • The design was retrospective and important data may be missing; reasons for the  
38 missing data (especially those of neutrophil or lymphocyte counts) were challenging  
39 to determine based on the available information.  
40
- 41 • The conclusions are qualitative rather than quantitative.  
42  
43  
44  
45  
46  
47  
48  
49  
50  
51  
52  
53  
54  
55  
56  
57

## BACKGROUND

Patients admitted to the intensive care unit (ICU) are usually severely ill, with high mortality rates and high hospital costs.<sup>1</sup> Therefore, identifying patients with a high risk of mortality is essential. Existing scoring systems to predict the risk of mortality in the ICU, such as the Simplified Acute Physiology Score (SAPS) and Acute Physiology and Chronic Health Evaluation,<sup>2</sup> do not include effective inflammatory markers. C-reactive protein and procalcitonin concentrations are widely recognized as indicators of inflammation; however, routine testing is not always available for every ICU patient because of cost considerations, especially for patients without infectious complications. Thus, identifying low-cost, easily accessible, and effective inflammatory markers may help predict mortality in ICU patients.

A blood examination is one of the routine tests conducted for every patient admitted to the ICU. In addition to total white blood cell (WBC) and differential counts, combined markers, such as the neutrophil-to-lymphocyte ratio (NLR) and platelet-to-lymphocyte ratio (PLR), have also attracted much attention in recent years. Numerous studies<sup>3-11</sup> have focused on the prognostic value of inflammatory markers in routine blood tests; however, the most sensitive indicator remains to be identified. More importantly, in clinical practice, we noted that some patients with a low NLR have a poor prognosis. However, when examining the literature, we found that although there are many studies on the NLR,<sup>3-11</sup> most of them concluded that a high NLR was associated with a poor prognosis, but ignored the prognostic value of a low NLR. Therefore, we conducted this study to verify which indicator is the best inflammatory marker in routine blood tests and to assess its prognostic value for mortality in ICU patients.



## METHODS

### Data Sources

Data for this study were obtained from the Medical Information Mart for Intensive Care III (MIMIC-III) database version 1.4 (<https://mimic.physionet.org>), which is a large, publicly available database comprising information on >40,000 patients who were admitted to the critical care unit of Beth Israel Deaconess Medical Center. Restrictions apply to the availability of these data, which were used under license for this study. Xie Wu completed the Collaborative Institutional Training Initiative program and was responsible for data extraction.

### Participants

All patients aged  $\geq 16$  years who were admitted to the ICU were included. For patients with multiple ICU admissions, only the first admission was included. Patients with missing or abnormal values for key variables within 24 h after ICU admission were excluded. Abnormal values in this study referred to a WBC count  $>400 \times 10^9/L$ , an NLR  $>100$ , or a PLR  $>8,000$ . Based on these inclusion and exclusion criteria, 21,822 patients were finally enrolled for data analysis.

### Data Extraction

Data from the MIMIC-III database were extracted using structured query language within PostgreSQL (version 11.2, <https://www.postgresql.org/>). Demographic data, laboratory parameters, the clinical outcomes of patients, and survival data were collected from all participants, including data on: age; sex; ethnicity; ICU type; WBC, lymphocyte, neutrophil, and platelet counts; ICU and hospital lengths of stay; in-hospital mortality; and 90-day and 1-year

1  
2  
3 mortality. Severity at admission was measured using the SAPS II. Laboratory parameters were  
4 assessed during the first 24 h after admission. The NLR and PLR were calculated by dividing the  
5 neutrophil or platelet count by the lymphocyte count. The SAPS II was automatically calculated  
6 in the database according to published scoring criteria.<sup>13</sup> Extracted data were presented in  
7 comma-separated value files, linked by identifiers, and integrated into a table using Stata version  
8 15.0 (Stata Corp., TX, USA).  
9

### 18 **Statistical Analyses**

20  
21 Statistical analyses were performed using Stata version 15.0 and MedCalc version 19.0.7  
22 (MedCalc Inc., Mariakerke, Belgium). Continuous variables are presented as medians with  
23 interquartile ranges, and were compared using the Wilcoxon rank sum test or Kruskal–Wallis  
24 test. Categorical variables are presented as frequencies with percentages, and were compared  
25 using the Fisher’s exact test or binomial probability test. Receiver operating characteristic curves  
26 were plotted to calculate the area under the curve (AUC), and were compared using the DeLong  
27 test. Optimal cut-off values for each inflammatory marker were determined using MedCalc  
28 version 19.0.7. Univariate and multivariate logistic regression analyses were performed to  
29 evaluate the prognostic value of the NLR for mortality. In the multivariate analysis, we adjusted  
30 for age, sex, ethnicity, ICU type, and the SAPS II. In addition to the traditional AUC, net  
31 reclassification improvement (NRI) and integrated discrimination improvement (IDI) were  
32 calculated to assess improvements in predictive power after adding the NLR. Subgroup analyses  
33 were performed to evaluate whether ICU type could influence the results. A  $p < 0.05$  was  
34 considered statistically significant.  
35  
36  
37  
38  
39  
40  
41  
42  
43  
44  
45  
46  
47  
48  
49  
50  
51  
52

### 54 **Patient and Public Involvement**

1  
2  
3 Patients or the public were not involved in the design, or conduct, or reporting, or dissemination  
4 plans of this research.  
5  
6  
7  
8  
9

## 10 RESULTS

11  
12  
13 Between June 2001 and October 2012, a total of 38,597 patients ( $\geq 16$  years) were admitted to the  
14 ICU. After the selection criteria were applied, 21,822 patients were included in the final analysis,  
15 with a mean ( $\pm$  standard deviation) age of 64.89 ( $\pm 17.80$ ) years; 46.47% were female. The in-  
16 hospital mortality rate was 14.43%, while the 90-day and 1-year mortality rates were 20.78% and  
17 28.57%, respectively. The median (interquartile range) lengths of ICU and hospital stay were  
18 2.08 (1.21–4.13) and 6.63 (3.79–11.79) days, respectively.  
19  
20  
21  
22  
23  
24  
25  
26  
27

28 Based on the in-hospital mortality data, patients were divided into survival and death groups. The  
29 baseline characteristics and clinical data are shown in **Table 1**. The death group was older and  
30 had more females than the survival group. Compared with overall in-hospital mortality, the  
31 mortality rate in the medical ICU (MICU) was significantly higher (14.43% vs. 16.31%,  
32 respectively). Blood examinations showed that the WBC count, neutrophil count, NLR, and PLR  
33 were significantly higher, whereas the lymphocyte and platelet counts were significantly lower,  
34 in the death group.  
35  
36  
37  
38  
39  
40  
41  
42  
43  
44

45 The AUC for all inflammatory markers and their optimal cut-off values are shown in  
46 **Supplemental Table 1**. The NLR had the greatest ability to predict in-hospital mortality (AUC:  
47 0.609;  $p < 0.001$ ). The in-hospital mortality rates for different NLRs are shown in **Supplemental**  
48 **Figure 1**. We found that both a high ( $>6$ ) and low ( $\leq 1$ ) NLR were associated with a higher  
49  
50  
51  
52  
53  
54  
55  
56  
57  
58  
59  
60

1  
2  
3 mortality rate. Therefore, we selected the NLR as our best inflammatory marker, with cut-off  
4  
5 values of 1 and 6.  
6  
7

8  
9 We further divided patients into three groups based on the NLR—low (NLR  $\leq 1$ ; n = 580),  
10  
11 medium ( $1 < \text{NLR} \leq 6$ ; n = 10,691), and high (NLR  $> 6$ ; n = 10,551) NLR groups—and  
12  
13 compared the clinical outcomes (**Table 2**). Compared with the medium NLR group, the low and  
14  
15 high NLR groups were both significantly associated with a poor prognosis. Their in-hospital, 90-  
16  
17 day, and 1-year mortality rates were significantly higher, and the hospital and ICU stays were  
18  
19 also significantly longer.  
20  
21

22  
23 **Table 3** presents the results of the logistic regression analyses for the association between the  
24  
25 NLR and mortality. In the univariate analysis, the NLR was significantly associated with in-  
26  
27 hospital, 90-day, and 1-year mortality. Very high or low NLRs may both be associated with  
28  
29 elevated mortality rates. Similar results were obtained in the multivariate analysis after adjusting  
30  
31 for age, sex, ethnicity, ICU type, and the SAPS II.  
32  
33

34  
35  
36 The predictive value of the NLR was evaluated by calculating the AUC, NRI, and IDI. As shown  
37  
38 in **Figure 1**, the addition of the NLR to the SAPS II significantly improved the AUC from 0.789  
39  
40 (95% confidence interval [CI]: 0.785–0.796) to 0.798 (95% CI: 0.793–0.804;  $p < 0.001$ , DeLong  
41  
42 test). The NRI and IDI for the NLR in relation to the SAPS II were 16.64% ( $p < 0.001$ ) and  
43  
44 0.27% ( $p < 0.001$ ), respectively. We also performed a subgroup analysis based on ICU types  
45  
46 (**Table 4**). The prognostic value of the NLR in the subgroups was similar to that of the total,  
47  
48 except for patients with a low NLR in the trauma surgical ICU.  
49  
50  
51  
52  
53  
54  
55  
56  
57  
58  
59  
60

## DISCUSSION

The main findings of this study are as follows. The NLR had the best predictive ability for in-hospital mortality in ICU patients. Further analyses based on the NLR revealed that patients with a high or low NLR were more likely to have higher mortality rates and longer ICU and hospital stays. The addition of the NLR significantly improved the predictive power of the SAPS II, and the results of the subgroup analysis based on ICU type were consistent with the overall population.

The predictive value of the NLR has been widely studied, particularly in cardiovascular disease,<sup>5, 8</sup> infectious disease,<sup>7, 9</sup> and cancer.<sup>10, 11, 14</sup> Most previous studies<sup>3-11</sup> have suggested that the higher the NLR, the worse the prognosis; however, other studies<sup>15, 16</sup> have suggested that a low NLR is also associated with a poor prognosis. If, as in previous studies, we divided patients equally into 3–5 groups based on their NLR, we could draw the same conclusion that a high NLR is indicative of a poor prognosis. However, before analysis, we noted that patients with a low NLR also seemed to have a poor prognosis. Thus, we implemented a different grouping scheme and confirmed our hypothesis by further analysis. Indeed, this finding was in line with clinical experience: the prognosis is generally good when the clinical indicators are within the normal range, and values that are too high or low are more likely to be associated with a poor prognosis. Several studies<sup>14, 17</sup> have suggested that the reason why an elevated NLR leads to a poor prognosis is mainly because of enhanced systemic inflammation and stress responses. However, the reason why a low NLR is associated with a poor prognosis remains unclear. We speculated that a decreased NLR may be due to a decrease in neutrophils that play a key role in the innate immune response, including directly killing pathogens by phagocytosis, releasing a variety of

1  
2  
3 cytokines, and activating T cells, among other roles.<sup>18</sup> Therefore, a reduction in circulating  
4 neutrophils can lower the body's response to microbial invasion. In addition, reduced circulating  
5 neutrophils can be ascribed to the increased neutrophil adhesion to the vascular endothelium,  
6 which can cause endothelial damage, leading to leukocyte aggregation and microvascular  
7 thrombosis.<sup>19</sup> Thus, the compromise of innate immunity and the increase in endothelial damage  
8 can collectively impair the prognosis of patients.

9  
10  
11  
12  
13  
14  
15  
16  
17  
18 Many previous studies<sup>3-11</sup> have overlooked the possibility of a low NLR leading to a poor  
19 prognosis, which may be due to several reasons. First, compared to the overall trend towards a  
20 high NLR correlating with a poor prognosis, the association between a low NLR and a poor  
21 prognosis may have been neglected due to the small number of patients. There were only 580  
22 patients with an NLR  $\leq 1$ , which was 2.66% of the total population. Second, the main outcome  
23 indicators may have influenced the conclusions. Previous studies, which have mostly focused on  
24 late death ( $\geq 5$  days), found that a high NLR can predict a poor prognosis. However, Riché *et al.*<sup>16</sup>  
25 reported that a low NLR is associated with an early death ( $< 5$  days), whereas a high NLR is  
26 associated with a late death. Duggal *et al.*<sup>17</sup> also suggested that an elevated NLR is a biomarker  
27 for an increased length of ICU stay. Therefore, based on previous studies that focused on late  
28 death, it is reasonable to conclude that a high NLR is associated with increased mortality.

29  
30  
31  
32  
33  
34  
35  
36  
37  
38  
39  
40  
41  
42  
43 However, in our study, around half of the in-hospital deaths (1,512/3,149; 48.02%) occurred  
44 within 5 days; thus, our study indicated that a low NLR is also associated with increased  
45 mortality. Third, the study population may have influenced the conclusions. Several studies have  
46 been conducted in patients with specific diseases,<sup>11, 14</sup> and those excluded often had a low NLR.  
47  
48  
49  
50  
51  
52  
53  
54  
55  
56  
57  
58  
59  
60  
Our study focused on all ICU patients with no case selection.

1  
2  
3 For patients in the MICU, many diseases can present with lymphocytosis and neutropenia,  
4 including haematological malignancies, such as acute lymphocytic leukaemia and  
5 myelodysplastic syndrome<sup>20, 21</sup>; haematopoietic system diseases, such as aplastic anaemia<sup>22</sup>;  
6  
7  
8  
9  
10  
11  
12  
13  
14  
15  
16  
17  
18  
19  
20  
21  
22  
23  
24  
25  
26  
27  
28  
29  
30  
31  
32  
33  
34  
35  
36  
37  
38  
39  
40  
41  
42  
43  
44  
45  
46  
47  
48  
49  
50  
51  
52  
53  
54  
55  
56  
57  
58  
59  
60

For patients in the MICU, many diseases can present with lymphocytosis and neutropenia, including haematological malignancies, such as acute lymphocytic leukaemia and myelodysplastic syndrome<sup>20, 21</sup>; haematopoietic system diseases, such as aplastic anaemia<sup>22</sup>; rheumatic diseases, such as systemic lupus erythematosus<sup>23</sup>; and infectious aetiologies, such as human immunodeficiency virus, hepatitis B virus, and Epstein–Barr virus. These patients are at an elevated risk of contracting bacterial and fungal infections, resulting in a poor prognosis.<sup>24</sup> This may also explain the over-representation of MICU patients with an NLR  $\leq 1$  (3.36%). In postoperative patients admitted to the surgical ICU, trauma surgical ICU, and cardiac surgery recovery unit, the NLR is usually high. First, surgical trauma itself can increase the NLR. Second, tissue damage caused by trauma or surgery can induce an acute inflammatory reaction, leading to the accumulation of neutrophils.<sup>25</sup> Third, surgery and anaesthesia expose the body to a state of stress, which induces the release of catecholamines and adrenocorticotrophic hormones, causing the bone marrow, liver, and spleen to produce neutrophils constantly, resulting in a massive release of immature neutrophils into the bloodstream.<sup>15</sup> Moreover, cortisol inhibits the synthesis of lymphocyte nucleic acids, which leads to lymphopenia.<sup>26</sup> Therefore, postoperative patients have a higher NLR. If the NLR is still abnormally low in postoperative patients, then the predominantly neutrophilic inflammatory response has probably not been activated, leading to a transient type of lymphocytosis,<sup>27</sup> resulting in a poor prognosis. This result is consistent with those of a previous report,<sup>28</sup> which showed that the mortality rate is significantly higher in trauma patients with lymphocytosis.

In this study, the SAPS II was chosen as a tool for predicting mortality. Although the SAPS III has better predictive ability,<sup>29</sup> there were too many missing values, because it requires collecting data within 1 h after admission; therefore, we chose to use the SAPS II. Some studies suggested

1  
2  
3 that the PLR also has the ability to predict mortality; therefore, we evaluated the predictive  
4 power of the PLR and found that, despite having some predictive ability, it was not as effective  
5 as the NLR. When we added the PLR to the SAPS II together with the NLR, the AUC value did  
6 not increase significantly; therefore, we did not incorporate the PLR into this model.  
7  
8  
9  
10  
11

12  
13 The major strengths of our study are the large sample size and the inclusion of all ICU patients  
14 without selection bias. Further, we noticed that the mortality rate was also elevated in patients  
15 with a low NLR. More importantly, we found that adding the NLR to the SAPS II could improve  
16 its predictive power for ICU mortality, which is an important prompt for future scoring systems  
17 and may be of particular interest to critical care specialists.  
18  
19  
20  
21  
22  
23  
24  
25

26 There are also some limitations to this study. First, this was a retrospective study and some  
27 important data may be missing. Some patients were excluded because of missing neutrophil or  
28 lymphocyte data, and it was difficult to explore the reasons for missing data based on the  
29 information currently available. Second, the conclusions of this study were qualitative rather than  
30 quantitative. We can only infer that the addition of the NLR can improve the performance of the  
31 SAPS II because the NLR scores cannot be directly included in the SAPS II to construct a new  
32 scoring system. Finally, although we conducted a subgroup analysis of different ICU types, in-  
33 depth analyses were not undertaken as it was not the aim of our study.  
34  
35  
36  
37  
38  
39  
40  
41  
42  
43  
44  
45  
46  
47  
48  
49

## 50 51 52 53 54 55 56 57 58 59 60

### CONCLUSIONS

Of the inflammatory markers identified from routine blood tests, the NLR was the best predictor  
of ICU mortality. Abnormally high or low NLRs were associated with increased mortality.



1  
2  
3  
4  
5  
6  
7  
8  
9  
10  
11  
12  
13  
14  
15  
16  
17  
18  
19  
20  
21  
22  
23  
24  
25  
26  
27  
28  
29  
30  
31  
32  
33  
34  
35  
36  
37  
38  
39  
40  
41  
42  
43  
44  
45  
46  
47  
48  
49  
50  
51  
52  
53  
54  
55  
56  
57  
58  
59  
60

Finally, the addition of the NLR to the SAPS II can improve its predictive power for ICU mortality.

For peer review only

## Author contributions

XW was fully responsible for all stages of the study, including design, data extraction, statistical analysis, and manuscript writing. FXY and SY was involved in the design of the original protocol. QPL and YNL participated in data curation and analyses. HBW and QL contributed to the discussion and interpretation of data. ZHS helped to draft the final manuscript. All authors read approved the final manuscript.

## Acknowledgments

The authors would like to thank the Medical Information Mart for Intensive Care III (MIMIC-III) database version 1.4 (<https://mimic.physionet.org>) for providing open access, and Editage ([www.editage.com](http://www.editage.com)) for their writing support.

## Ethical Statement

Since MIMIC-III is a third-party, anonymized, publicly available database with pre-existing Institutional Review Board approval at BIDMC and MIT, we were exempted from obtaining approval from our institution.

## REFERENCES

1. Adhikari NK, Fowler RA, Bhagwanjee S, Rubenfeld GD. Critical care and the global burden of critical illness in adults. LANCET 2010;376.
2. Lemeshow S, Le Gall JR. Modeling the severity of illness of ICU patients. A systems update. JAMA 1994;272.
3. Fest J, Ruiters TR, Groot KB, *et al.*. The neutrophil-to-lymphocyte ratio is associated with mortality in the general population: The Rotterdam Study. EUR J EPIDEMIOL 2019;34.
4. Saliccioli JD, Marshall DC, Pimentel MA, *et al.*. The association between the neutrophil-to-lymphocyte ratio and mortality in critical illness: an observational cohort study. CRIT CARE 2015;19.
5. Sun H, Que J, Peng Y, *et al.*. The neutrophil-lymphocyte ratio: A promising predictor of mortality in coronary care unit patients - A cohort study. INT IMMUNOPHARMACOL 2019;74.
6. Yoldas H, Karagoz I, Ogun MN, *et al.*. Novel Mortality Markers for Critically Ill Patients. J INTENSIVE CARE MED 2020;35.
7. Ye W, Chen X, Huang Y, *et al.*. The association between neutrophil-to-lymphocyte count ratio and mortality in septic patients: a retrospective analysis of the MIMIC-III database. J THORAC DIS 2020;12.
8. Kim S, Eliot M, Koestler DC, Wu WC, Kelsey KT. Association of Neutrophil-to-Lymphocyte Ratio With Mortality and Cardiovascular Disease in the Jackson Heart Study and Modification by the Duffy Antigen Variant. JAMA CARDIOL 2018;3.

- 1  
2  
3  
4 9. Russell CD, Parajuli A, Gale HJ, *et al.*. The utility of peripheral blood leucocyte  
5  
6 ratios as biomarkers in infectious diseases: A systematic review and meta-analysis. J  
7  
8 INFECTION 2019;78.  
9
- 10  
11 10. Valero C, Zanoni DK, McGill MR, *et al.*. Pretreatment peripheral blood  
12  
13 leukocytes are independent predictors of survival in oral cavity cancer. CANCER-AM  
14  
15 CANCER SOC 2019;126.  
16  
17
- 18  
19 11. Shi M, Zhao W, Zhou F, *et al.*. Neutrophil or platelet-to-lymphocyte ratios in  
20  
21 blood are associated with poor prognosis of pulmonary large cell neuroendocrine  
22  
23 carcinoma. Translational Lung Cancer Research 2020;9.  
24  
25
- 26  
27 12. Le Gall JR. A new Simplified Acute Physiology Score (SAPS II) based on a  
28  
29 European/North American multicenter study. JAMA: The Journal of the American  
30  
31 Medical Association 1993;270.  
32  
33
- 34  
35 13. Gemenetzis G, Bagante F, Griffin JF, *et al.*. Neutrophil-to-lymphocyte Ratio is a  
36  
37 Predictive Marker for Invasive Malignancy in Intraductal Papillary Mucinous  
38  
39 Neoplasms of the Pancreas. ANN SURG 2017;266.  
40  
41
- 42  
43 14. Hwang SY, Shin TG, Jo IJ, *et al.*. Neutrophil-to-lymphocyte ratio as a prognostic  
44  
45 marker in critically-ill septic patients. AM J EMERG MED 2017;35.  
46  
47
- 48  
49 15. Riché F, Gayat E, Barthélémy R, Le Dorze M, Matéo J, Payen D. Reversal of  
50  
51 neutrophil-to-lymphocyte count ratio in early versus late death from septic shock.  
52  
53 CRIT CARE 2015;19.  
54  
55
- 56  
57 16. Duggal NA, Snelson C, Shaheen U, Pearce V, Lord JM. Innate and adaptive  
58  
59 immune dysregulation in critically ill ICU patients. SCI REP-UK 2018;8.  
60

- 1  
2  
3  
4 17. Uhl B, Vadlau Y, Zuchtriegel G, *et al.*. Aged neutrophils contribute to the first  
5  
6 line of defense in the acute inflammatory response. *BLOOD* 2016;128.  
7  
8  
9 18. Entman ML, Youker K, Shappell SB, *et al.*. Neutrophil adherence to isolated  
10  
11 adult canine myocytes. Evidence for a CD18-dependent mechanism. *J CLIN INVEST*  
12  
13 1990;85.  
14  
15  
16 19. Inaba H, Pei D, Wolf J, *et al.*. Infection-related complications during treatment  
17  
18 for childhood acute lymphoblastic leukemia. *ANN ONCOL* 2017;28.  
19  
20  
21 20. Wells RA, Buckstein R, Rezmovitz J. Myelodysplastic syndrome. *CAN MED*  
22  
23 *ASSOC J* 2016;188.  
24  
25  
26 21. Brodsky RA, Jones RJ. Aplastic anaemia. *The Lancet* 2005;365.  
27  
28  
29 22. Kaplan MJ. Neutrophils in the pathogenesis and manifestations of SLE. *Nature*  
30  
31 *reviews. Rheumatology* 2011;7.  
32  
33  
34 23. Carvalho AS, Lagana D, Catford J, Shaw D, Bak N. Bloodstream infections in  
35  
36 neutropenic patients with haematological malignancies. *Infect Dis Health* 2020;25.  
37  
38  
39 24. Silberman S, Abu-Yunis U, Tauber R, *et al.*. Neutrophil-Lymphocyte Ratio:  
40  
41 Prognostic Impact in Heart Surgery. Early Outcomes and Late Survival. *The Annals*  
42  
43 *of Thoracic Surgery* 2018;105.  
44  
45  
46 25. Tsai S, Wu M, Chen C. Low serum C3 level, high neutrophil-lymphocyte-ratio,  
47  
48 and high platelet-lymphocyte-ratio all predicted poor long-term renal survivals in  
49  
50 biopsy-confirmed idiopathic membranous nephropathy. *SCI REP-UK* 2019;9.  
51  
52  
53 26. Tekin YK. Are Neutrophil-to-Lymphocyte and Platelet-to-Lymphocyte Ratios  
54  
55 Associated with Mortality in Pediatric Trauma Patients? A Retrospective Study.  
56  
57  
58  
59  
60

1  
2  
3  
4 Rambam Maimonides Med J 2019;10.  
5

6  
7 27. Pinkerton PH, McLellan BA, Quantz MC, Robinson JB. Acute lymphocytosis  
8  
9 after trauma--early recognition of the high-risk patient? J Trauma 1989;29.  
10

11  
12 28. Polzik P, Grøndal O, Tavenier J, *et al.*. SuPAR correlates with mortality and  
13  
14 clinical severity in patients with necrotizing soft-tissue infections: results from a  
15  
16 prospective, observational cohort study. SCI REP-UK 2019;9.  
17  
18  
19  
20  
21  
22  
23  
24  
25  
26  
27  
28  
29  
30  
31  
32  
33  
34  
35  
36  
37  
38  
39  
40  
41  
42  
43  
44  
45  
46  
47  
48  
49  
50  
51  
52  
53  
54  
55  
56  
57  
58  
59  
60

## Tables

**Table 1 Baseline characteristics according to survivors and death**

|                                 | <b>Overall<br/>(n=21,822)</b> | <b>Survival group<br/>(n=18,673)</b> | <b>Death group<br/>(n=3,149)</b> | <b>P</b> |
|---------------------------------|-------------------------------|--------------------------------------|----------------------------------|----------|
| Age, years                      | 66.68 (52.76, 79.55)          | 65.37 (51.65, 78.41)                 | 75.05 (61.16, 83.58)             | <0.001   |
| Sex, n (%)                      |                               |                                      |                                  | 0.004    |
| Female                          | 10,140 (46.47)                | 8,602 (46.07)                        | 1,538 (48.84)                    |          |
| Male                            | 11,682 (53.53)                | 10,071 (53.93)                       | 1,611 (51.16)                    |          |
| Ethnicity, n (%)                |                               |                                      |                                  | <0.001   |
| White                           | 15,875 (72.75)                | 13,619 (72.93)                       | 2,256 (71.64)                    |          |
| Black                           | 2,080 (9.53)                  | 1,857 (9.94)                         | 223 (7.08)                       |          |
| Other                           | 3,867 (17.72)                 | 3,197 (17.12)                        | 670 (21.28)                      |          |
| ICU type                        |                               |                                      |                                  | <0.001   |
| CCU                             | 3,331 (15.26)                 | 2,864 (15.34)                        | 467 (14.83)                      |          |
| CSRU                            | 2,443 (11.20)                 | 2,279 (12.20)                        | 164 (5.21)                       |          |
| MICU                            | 10,411 (47.71)                | 8,713 (46.66)                        | 1,698 (53.92)                    |          |
| SICU                            | 3,775 (17.30)                 | 3,201 (17.14)                        | 574 (18.23)                      |          |
| TSICU                           | 1,862 (8.53)                  | 1,616 (8.65)                         | 246 (7.81)                       |          |
| SAPS II                         | 34 (25, 43)                   | 32 (24, 40)                          | 48 (37.5, 60)                    | <0.001   |
| Peripheral blood index          |                               |                                      |                                  |          |
| WBC (10 <sup>9</sup> /L)        | 9.9 (7.1, 13.9)               | 9.7 (7.1, 13.6)                      | 11.4 (7.6, 16.6)                 | <0.001   |
| Lymphocyte (10 <sup>9</sup> /L) | 1.30 (0.83, 1.91)             | 1.34 (0.87, 1.94)                    | 1.06 (0.67, 1.62)                | <0.001   |
| Neutrophil (10 <sup>9</sup> /L) | 7.56 (4.88, 11.45)            | 7.34 (4.82, 11.07)                   | 9.16 (5.49, 13.60)               | <0.001   |
| Platelet (10 <sup>9</sup> /L)   | 208 (150, 275)                | 210 (155, 275)                       | 192 (119, 277)                   | <0.001   |
| NLR                             | 5.75 (3.09, 11.13)            | 5.40 (2.95, 10.46)                   | 8.32 (4.25, 14.75)               | <0.001   |
| PLR                             | 177.9 (115.4, 287.4)          | 175.1(115.1, 280.0)                  | 199.1 (117.8, 334.9)             | <0.001   |

Data are presented as median and interquartile range or number and percentage.

ICU, intensive care unit; CCU, coronary care unit; CSRU, cardiac surgery recovery units; MICU, medical ICU; SICU, surgical ICU; TSICU trauma surgical ICU; SAPS, Simplified Acute Physiology Score; WBC, white blood cell; NLR, neutrophil-to-lymphocyte ratio; PLR, platelet-to-lymphocyte ratio.

**Table 2 Clinical outcomes of the ICU patients**

| Clinical outcomes           | Overall<br>(n=21822) | NLR                |                    |                    | P      |
|-----------------------------|----------------------|--------------------|--------------------|--------------------|--------|
|                             |                      | ≤1 (n=580)         | (1, 6] (n=10691)   | > 6 (n=10,551)     |        |
| Hospital mortality, n (%)   | 3149 (14.43)         | 122 (21.03)        | 1,009 (9.44)       | 2,018 (19.13)      | <0.001 |
| 90-Day mortality, n (%)     | 4534 (20.78)         | 155 (26.72)        | 1,511 (14.13)      | 2,868 (27.18)      | <0.001 |
| 1-Year mortality, n (%)     | 6234 (28.57)         | 211 (36.38)        | 2,311 (21.62)      | 3,712 (35.18)      | <0.001 |
| ICU length of stay (d)      | 2.08 (1.21, 4.13)    | 2.04 (1.08, 4.38)  | 1.96 (1.13, 3.46)  | 2.38 (1.33, 5.04)  | <0.001 |
| Hospital length of stay (d) | 6.63 (3.79, 11.79)   | 7.35 (3.34, 15.86) | 6.08 (3.63, 10.79) | 7.00 (3.96, 12.67) | <0.001 |

Data are presented as median and interquartile range or number and percentage.



**Table 3 Association between NLR and mortality**

| Exposure              | Non-adjusted      |          | Adjusted          |          |
|-----------------------|-------------------|----------|-------------------|----------|
|                       | OR (95%CI)        | <i>P</i> | OR (95%CI)        | <i>P</i> |
| In-hospital mortality |                   |          |                   |          |
| ≤1                    | 2.56 (2.07, 3.15) | <0.001   | 1.61 (1.26, 2.05) | <0.001   |
| (1, 6]                | 1                 |          | 1                 |          |
| >6                    | 2.27 (2.09, 2.46) | <0.001   | 1.59 (1.46, 1.74) | <0.001   |
| 90-Day mortality      |                   |          |                   |          |
| ≤1                    | 1.96 (1.65, 2.33) | <0.001   | 1.48 (1.18, 1.85) | <0.001   |
| (1, 6]                | 1                 |          | 1                 |          |
| >6                    | 2.08 (1.95, 2.22) | <0.001   | 1.60 (1.48, 1.43) | <0.001   |
| 1-Year mortality      |                   |          |                   |          |
| ≤1                    | 2.07 (1.74, 2.47) | <0.001   | 1.51 (1.23, 1.86) | <0.001   |
| (1, 6]                | 1                 |          | 1                 |          |
| >6                    | 1.97 (1.85, 2.09) | <0.001   | 1.38 (1.29, 1.48) | <0.001   |

Adjusted confounders: age, sex, ethnicity, ICU type and SAPS II.

**Table 4 Subgroup analyses of the association between In-hospital mortality and NLR levels.**

| Subgroups | NLR        |                   |               |                   |
|-----------|------------|-------------------|---------------|-------------------|
|           | ≤ 1        | (1, 6]            | >6            |                   |
| CCU       | n (%)      | 74 (2.22)         | 1,712 (51.4)  | 1545 (46.38)      |
|           | OR (95%CI) | 2.43 (1.21, 4.86) | 1             | 1.82 (1.44, 2.31) |
|           | <i>P</i>   | 0.012             |               | <0.001            |
| CSRU      | n (%)      | 46 (1.88)         | 1,812 (74.17) | 585 (23.95)       |
|           | OR (95%CI) | 3.72 (1.45, 9.54) | 1             | 3.25 (2.29, 4.61) |
|           | <i>P</i>   | 0.006             |               | <0.001            |
| MICU      | n (%)      | 350 (3.36)        | 4,635 (44.52) | 5,426 (52.12)     |
|           | OR (95%CI) | 1.77 (1.30, 2.41) | 1             | 1.44 (1.27, 1.63) |
|           | <i>P</i>   | <0.001            |               | <0.001            |
| SICU      | n (%)      | 73 (1.93)         | 1,767 (46.81) | 1,935 (51.26)     |
|           | OR (95%CI) | 2.43 (1.24, 4.78) | 1             | 1.71 (1.39, 2.10) |
|           | <i>P</i>   | <0.001            |               | <0.001            |
| TSICU     | n (%)      | 37 (1.99)         | 765 (41.08)   | 1,060 (56.93)     |
|           | OR (95%CI) | 1.99 (0.79, 5.00) | 1             | 1.55 (1.13, 2.12) |
|           | <i>P</i>   | 0.144             |               | 0.007             |

Confounders adjustment were performed as before (Table 3).

ICU, intensive care unit; CCU, coronary care unit; CSRU, cardiac surgery recovery units; MICU, medical ICU; SICU, surgical ICU; TSICU trauma surgical ICU.

## Figure Legends

**Supplemental Figure 1:** Association of in-hospital mortality rates and different NLR levels.

**Figure 1:** Receiver operating characteristic curves for the SAPS II and the SAPS II+NLR.

SAPS, Simplified Acute Physiology Score; NLR, Neutrophil-to-Lymphocyte Ratio; AUC, area under the receiver-operating characteristic curve; IDI, integrated discrimination improvement; NRI, net reclassification improvement.

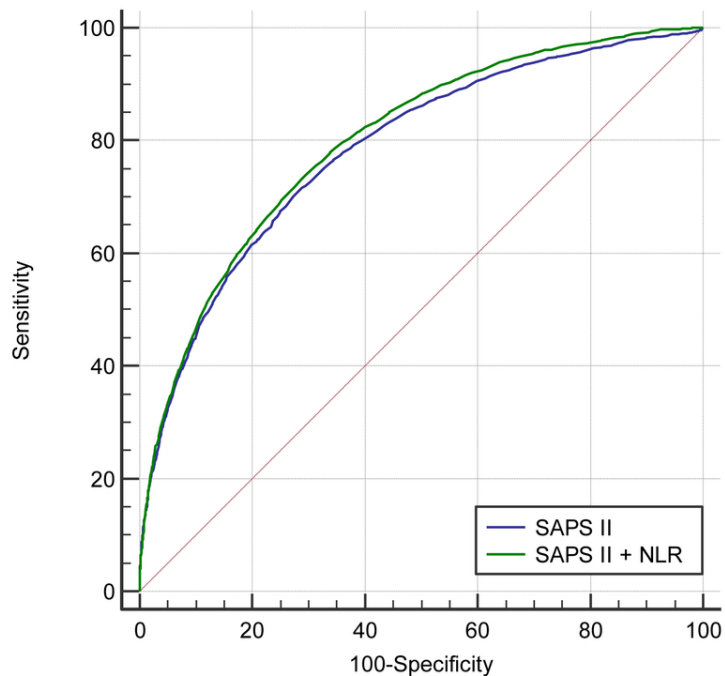

|                               | <b>SAPS II</b> | <b>SAPSII+NLR</b> | <b>P-value</b> |
|-------------------------------|----------------|-------------------|----------------|
| <b>AUC</b>                    | 0.789          | 0.798             | < 0.001        |
| <b>SAPS II vs. SAPSII+NLR</b> |                |                   |                |
| <b>NRI</b>                    |                | 16.64%            | < 0.001        |
| <b>IDI</b>                    |                | 0.27%             | < 0.001        |

Figure 1

90x96mm (300 x 300 DPI)

**Supplemental Table 1 The optimal cut-off values based on in-hospital mortality**

| <b>Peripheral blood index</b> | <b>Cut-off value</b> | <b>AUC</b> | <b>P</b> |
|-------------------------------|----------------------|------------|----------|
| WBC ( $10^9/L$ )              | 12                   | 0.575      | <0.001   |
| Lymphocyte ( $10^9/L$ )       | 1.17                 | 0.593      | <0.001   |
| Neutrophil ( $10^9/L$ )       | 9.57                 | 0.576      | <0.001   |
| Platelet ( $10^9/L$ )         | 128                  | 0.554      | <0.001   |
| NLR                           | 6                    | 0.609      | <0.001   |
| PLR                           | 267                  | 0.536      | <0.001   |

WBC, white blood cell; NLR, neutrophil-to-lymphocyte ratio; PLR, platelet-to-lymphocyte ratio.

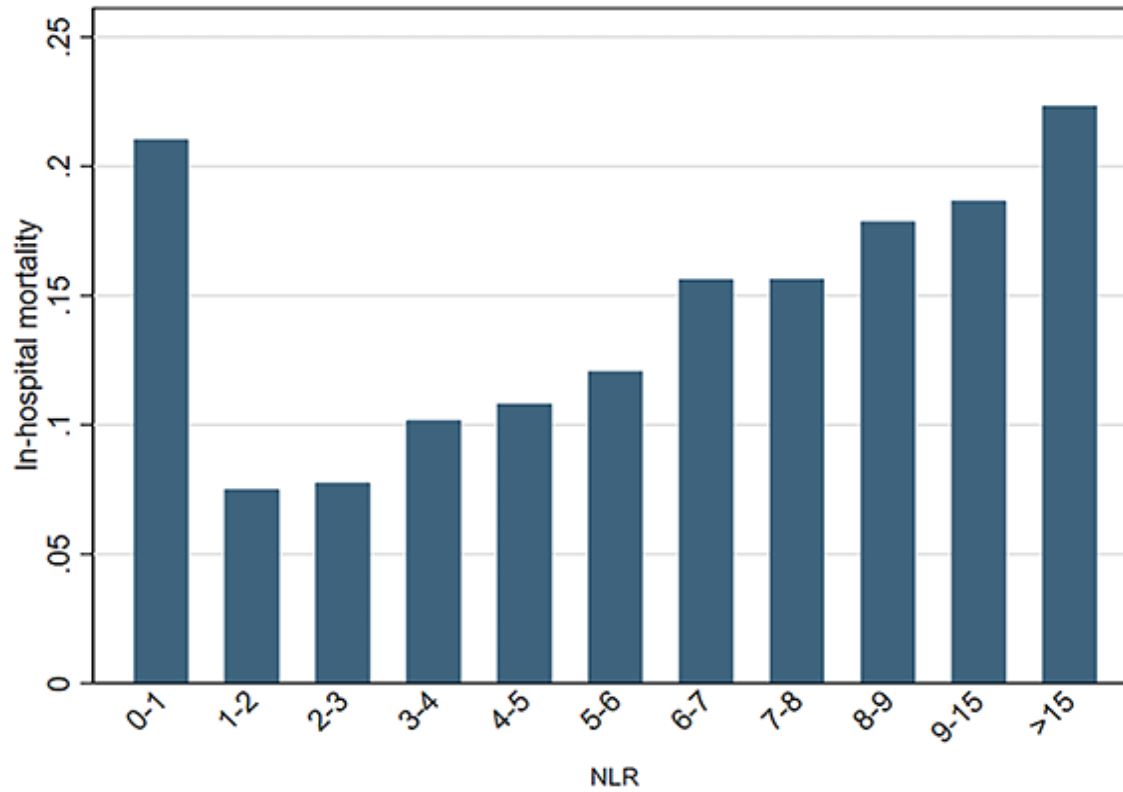

# BMJ Open

## Neutrophil-to-Lymphocyte Ratio as a Predictor of Mortality in Intensive Care Unit Patients: A Retrospective Analysis of the Medical Information Mart for Intensive Care III Database

|                                 |                                                                                                                                                                                                                                                                                                                                                                                                                                                                                                                                                                                                                                                                                                                                                                                                                                                                                                                                                                                  |
|---------------------------------|----------------------------------------------------------------------------------------------------------------------------------------------------------------------------------------------------------------------------------------------------------------------------------------------------------------------------------------------------------------------------------------------------------------------------------------------------------------------------------------------------------------------------------------------------------------------------------------------------------------------------------------------------------------------------------------------------------------------------------------------------------------------------------------------------------------------------------------------------------------------------------------------------------------------------------------------------------------------------------|
| Journal:                        | <i>BMJ Open</i>                                                                                                                                                                                                                                                                                                                                                                                                                                                                                                                                                                                                                                                                                                                                                                                                                                                                                                                                                                  |
| Manuscript ID                   | bmjopen-2021-053548.R1                                                                                                                                                                                                                                                                                                                                                                                                                                                                                                                                                                                                                                                                                                                                                                                                                                                                                                                                                           |
| Article Type:                   | Original research                                                                                                                                                                                                                                                                                                                                                                                                                                                                                                                                                                                                                                                                                                                                                                                                                                                                                                                                                                |
| Date Submitted by the Author:   | 30-Sep-2021                                                                                                                                                                                                                                                                                                                                                                                                                                                                                                                                                                                                                                                                                                                                                                                                                                                                                                                                                                      |
| Complete List of Authors:       | Wu, Xie; Chinese Academy of Medical Sciences & Peking Union Medical College Fuwai Hospital, Department of Anesthesiology<br>Luo, Qipeng; Peking University Third Hospital, Department of Pain Medicine<br>Su, Zhanhao; Chinese Academy of Medical Sciences & Peking Union Medical College Fuwai Hospital, Department of pediatric cardiac surgery<br>Li, Yanan; Chinese Academy of Medical Sciences & Peking Union Medical College Fuwai Hospital, Department of Anesthesiology<br>Wang, Hongbai; Chinese Academy of Medical Sciences & Peking Union Medical College Fuwai Hospital, Anaesthesiology<br>Liu, Qiao; Chinese Academy of Medical Sciences & Peking Union Medical College Fuwai Hospital, Department of Anesthesiology<br>Yuan, Su; Chinese Academy of Medical Sciences & Peking Union Medical College Fuwai Hospital, Anesthesiology<br>Yan, Fuxia; Chinese Academy of Medical Sciences & Peking Union Medical College Fuwai Hospital, Department of Anesthesiology |
| <b>Primary Subject Heading</b>: | Intensive care                                                                                                                                                                                                                                                                                                                                                                                                                                                                                                                                                                                                                                                                                                                                                                                                                                                                                                                                                                   |
| Secondary Subject Heading:      | Intensive care                                                                                                                                                                                                                                                                                                                                                                                                                                                                                                                                                                                                                                                                                                                                                                                                                                                                                                                                                                   |
| Keywords:                       | Adult intensive & critical care < INTENSIVE & CRITICAL CARE, Adverse events < THERAPEUTICS, Risk management < HEALTH SERVICES ADMINISTRATION & MANAGEMENT                                                                                                                                                                                                                                                                                                                                                                                                                                                                                                                                                                                                                                                                                                                                                                                                                        |
|                                 |                                                                                                                                                                                                                                                                                                                                                                                                                                                                                                                                                                                                                                                                                                                                                                                                                                                                                                                                                                                  |

SCHOLARONE™  
Manuscripts



I, the Submitting Author has the right to grant and does grant on behalf of all authors of the Work (as defined in the below author licence), an exclusive licence and/or a non-exclusive licence for contributions from authors who are: i) UK Crown employees; ii) where BMJ has agreed a CC-BY licence shall apply, and/or iii) in accordance with the terms applicable for US Federal Government officers or employees acting as part of their official duties; on a worldwide, perpetual, irrevocable, royalty-free basis to BMJ Publishing Group Ltd ("BMJ") its licensees and where the relevant Journal is co-owned by BMJ to the co-owners of the Journal, to publish the Work in this journal and any other BMJ products and to exploit all rights, as set out in our [licence](#).

The Submitting Author accepts and understands that any supply made under these terms is made by BMJ to the Submitting Author unless you are acting as an employee on behalf of your employer or a postgraduate student of an affiliated institution which is paying any applicable article publishing charge ("APC") for Open Access articles. Where the Submitting Author wishes to make the Work available on an Open Access basis (and intends to pay the relevant APC), the terms of reuse of such Open Access shall be governed by a Creative Commons licence – details of these licences and which [Creative Commons](#) licence will apply to this Work are set out in our licence referred to above.

Other than as permitted in any relevant BMJ Author's Self Archiving Policies, I confirm this Work has not been accepted for publication elsewhere, is not being considered for publication elsewhere and does not duplicate material already published. I confirm all authors consent to publication of this Work and authorise the granting of this licence.



1  
2  
3  
4 **1 Neutrophil-to-Lymphocyte Ratio as a Predictor of Mortality in Intensive Care Unit**  
5  
6 **2 Patients: A Retrospective Analysis of the Medical Information Mart for Intensive**  
7  
8 **3 Care III Database**  
9  
10

11  
12 4 Xie Wu, M.D.<sup>1</sup>; Qipeng Luo, M.D.<sup>2</sup>; Zhanhao Su, M.D.<sup>3</sup>; Yinan Li, M.D.<sup>1</sup>; Hongbai Wang,  
13  
14 5 M.D.<sup>1</sup>; Qiao Liu, M.D.<sup>1</sup>; Su Yuan, M.D.<sup>1</sup>; and Fuxia Yan, M.D., Ph.D.<sup>1</sup>  
15  
16

17  
18  
19 7 <sup>1</sup>Department of Anesthesiology, Fuwai Hospital, National Center of Cardiovascular  
20  
21 8 Diseases, Chinese Academy of Medical Sciences and Peking Union Medical College,  
22  
23 9 Beijing, China  
24  
25

26 10 <sup>2</sup>Department of Pain Medicine, Peking University Third Hospital, Beijing, China  
27

28 11 <sup>3</sup>Center for Pediatric Cardiac Surgery, Fuwai Hospital, National Center of Cardiovascular  
29  
30 12 Diseases, Chinese Academy of Medical Sciences and Peking Union Medical College,  
31  
32 13 Beijing, China  
33  
34

35  
36  
37 15 **Corresponding Author:**  
38

39  
40 16 Fuxia Yan, M.D., Ph.D.  
41

42 17 Department of Anesthesiology, Fuwai Hospital, Chinese Academy of Medical Sciences and  
43  
44 18 Peking Union Medical College  
45

46  
47 19 167 Beilishi Road, Xicheng District, Beijing 100037, China  
48

49 20 E-mail: [yanfuxia@sina.com](mailto:yanfuxia@sina.com)  
50

51 21  
52

53 22  
54  
55  
56  
57  
58  
59  
60

1  
2  
3  
4  
5  
6  
7  
8  
9  
10  
11  
12  
13  
14  
15  
16  
17  
18  
19  
20  
21  
22  
23  
24  
25  
26  
27  
28  
29  
30  
31  
32  
33  
34  
35  
36  
37  
38  
39  
40  
41  
42  
43  
44  
45  
46  
47  
48  
49  
50  
51  
52  
53  
54  
55  
56  
57  
58  
59  
60

1 **Disclaimers:** The views expressed in the manuscript are our own and not an official  
2 position of the institution or funder.

3

4 **Word count:** 2,471

5 **Number of figures and tables:** Tables (04), Figures (01)

For peer review only

1  
2  
3  
4  
5 **1 Abstract**  
6

7  
8 **2 Objectives:** Identifying high-risk patients in the intensive care unit (ICU) is important  
9  
10 given the high mortality rate. However, existing scoring systems lack easily accessible,  
11  
12 3 given the high mortality rate. However, existing scoring systems lack easily accessible,  
13  
14 4 low-cost, and effective inflammatory markers. We aimed to identify inflammatory markers  
15  
16 5 in routine blood tests to predict mortality in ICU patients and evaluate their predictive  
17  
18 6 power.  
19

20  
21 **7 Design:** Retrospective case-control study.  
22

23  
24 **8 Setting:** Single secondary care centre.  
25  
26

27  
28 **9 Participants:** We analysed data from the Medical Information Mart for Intensive Care III  
29  
30 10 database. A total of 21,822 ICU patients were enrolled and divided into survival and death  
31  
32 11 groups based on in-hospital mortality.  
33  
34

35  
36 **12 Primary and secondary outcome measures:** The predictive values of potential  
37  
38 13 inflammatory markers were evaluated and compared using receiver operating characteristic  
39  
40 14 curve analysis. After identifying the neutrophil-to-lymphocyte ratio (NLR) as having the  
41  
42 15 best predictive ability, patients were re-divided into low ( $\leq 1$ ), medium (1–6), and high ( $> 6$ )  
43  
44 16 NLR groups. Univariate and multivariate logistic regression analyses were performed to  
45  
46 17 evaluate the association between the NLR and mortality. The area under the curve (AUC),  
47  
48 18 net reclassification improvement (NRI), and integrated discrimination improvement (IDI)  
49  
50 19 were used to assess whether incorporating the NLR could improve the predictive power of  
51  
52 20 existing scoring systems.  
53  
54  
55  
56  
57

1 **Results:** The NLR had the best predictive ability (AUC: 0.609;  $p < 0.001$ ). In-hospital  
2 mortality rates were significantly higher in the low (odds ratio [OR]: 2.09; 95% confidence  
3 interval [CI]: 1.64–2.66) and high (OR: 1.64; 95% CI: 1.50–1.80) NLR groups than in the  
4 medium NLR group. Adding the NLR to the Simplified Acute Physiology Score II  
5 improved the AUC from 0.789 to 0.798, with an NRI and IDI of 16.64% and 0.27%,  
6 respectively.

7 **Conclusions:** The NLR predicted mortality in ICU patients well. Both low and high NLRs  
8 were associated with elevated mortality rates. Including the NLR may improve the  
9 predictive power of the Simplified Acute Physiology Score II.

#### 10 **Strengths and limitations of this study**

- 11 • This study included a large sample size and avoided selection bias by inclusion of all  
12 ICU patients.
- 13 • This study noticed that the mortality rate was also elevated in patients with a low  
14 NLR.
- 15 • The design was retrospective and important data may be missing; reasons for the  
16 missing data (especially those of neutrophil or lymphocyte counts) were challenging  
17 to determine based on the available information.
- 18 • The conclusions are qualitative rather than quantitative.

## 1 BACKGROUND

2 Patients admitted to the intensive care unit (ICU) are usually severely ill, with high mortality  
3 rates and high hospital costs.<sup>[1]</sup> Therefore, identifying patients with a high risk of mortality is  
4 essential. Existing scoring systems to predict the risk of mortality in the ICU, such as the  
5 Simplified Acute Physiology Score (SAPS) and Acute Physiology and Chronic Health  
6 Evaluation,<sup>[2]</sup> do not include effective inflammatory markers. C-reactive protein and  
7 procalcitonin concentrations are widely recognized as indicators of inflammation; however,  
8 routine testing is not always available for every ICU patient because of cost considerations,  
9 especially for patients without infectious complications. Thus, identifying low-cost, easily  
10 accessible, and effective inflammatory markers may help predict mortality in ICU patients.

11 A blood examination is one of the routine tests conducted for every patient admitted to the ICU.  
12 In addition to total white blood cell (WBC) and differential counts, combined markers, such as  
13 the neutrophil-to-lymphocyte ratio (NLR) and platelet-to-lymphocyte ratio (PLR), have also  
14 attracted much attention in recent years. Numerous studies<sup>[3-11]</sup> have focused on the prognostic  
15 value of inflammatory markers in routine blood tests; however, the most sensitive indicator  
16 remains to be identified. More importantly, in clinical practice, we noted that some patients with  
17 a low NLR have a poor prognosis. However, when examining the literature, we found that  
18 although there are many studies on the NLR,<sup>[3-11]</sup> most of them concluded that a high NLR was  
19 associated with a poor prognosis, but ignored the prognostic value of a low NLR. Therefore, we  
20 conducted this study to verify which indicator is the best inflammatory marker in routine blood  
21 tests and to assess its prognostic value for mortality in ICU patients.

## 1       2       3       4       5       6       7       8       9       10       11       12       13       14       15       16       17       18       19       20       21       22       23       24       25       26       27       28       29       30       31       32       33       34       35       36       37       38       39       40       41       42       43       44       45       46       47       48       49       50       51       52       53       54       55       56       57       58       59       60

# 1       **METHODS**

## 2       **Data Sources**

3       Data for this study were obtained from the Medical Information Mart for Intensive Care III  
4       (MIMIC-III) database version 1.4 (<https://mimic.physionet.org>), which is a large, publicly  
5       available database comprising information on >40,000 patients who were admitted to the critical  
6       care unit of Beth Israel Deaconess Medical Center. Restrictions apply to the availability of these  
7       data, which were used under license for this study. Xie Wu completed the Collaborative  
8       Institutional Training Initiative program and was responsible for data extraction (certification  
9       number: 35931746).

## 10       **Participants**

11       All patients who were admitted to the ICU were included. The exclusion criteria were as follows:  
12       (1) patients younger than 16 years old; (2) patients who are not the first hospitalization; (3)  
13       patients who had no blood routine test data within 24h of hospitalization; (4) patients with  
14       abnormal values for key variables; (5) patients with missing data greater than 10%. Abnormal  
15       values in this study were defined as extreme outliers, that is WBC count  $>400 \times 10^9/L$ , NLR  
16        $>100$ , and PLR  $>8,000$ . Based on these inclusion and exclusion criteria, 21,822 patients were  
17       finally enrolled for data analysis. The missing values of all selected variables are less than 10%,  
18       so we replaced the missing observations with the mean values.

## 19       **Data Extraction**

20       Data from the MIMIC-III database were extracted using structured query language within  
21       PostgreSQL (version 11.2, <https://www.postgresql.org/>). Demographic data, laboratory

1 parameters, the clinical outcomes of patients, and survival data were collected from all  
2 participants, including data on: age; sex; ethnicity; ICU type; WBC, lymphocyte, neutrophil, and  
3 platelet counts; ICU and hospital lengths of stay; in-hospital mortality; and 90-day and 1-year  
4 mortality. Severity at admission was measured using the SAPS II. Laboratory parameters were  
5 assessed during the first 24 h after admission. The NLR and PLR were calculated by dividing the  
6 neutrophil or platelet count by the lymphocyte count. The SAPS II was automatically calculated  
7 in the database according to published scoring criteria.<sup>[12]</sup> Extracted data were presented in  
8 comma-separated value files, linked by identifiers, and integrated into a table using Stata version  
9 15.0 (Stata Corp., TX, USA).

## 10 **Statistical Analyses**

11 Statistical analyses were performed using Stata version 15.0 and MedCalc version 19.0.7  
12 (MedCalc Inc., Mariakerke, Belgium). Continuous variables are presented as medians with  
13 interquartile ranges, and were compared using the Wilcoxon rank sum test or Kruskal–Wallis  
14 test. Categorical variables are presented as frequencies with percentages, and were compared  
15 using the Fisher’s exact test or binomial probability test. Receiver operating characteristic curves  
16 were plotted to calculate the area under the curve (AUC), and were compared using the DeLong  
17 test. Optimal cut-off values for each inflammatory marker were determined using MedCalc  
18 version 19.0.7. Univariate and multivariate logistic regression analyses were performed to  
19 evaluate the prognostic value of the NLR for mortality. In the multivariate analysis, we adjusted  
20 for variables with a *p* value less than 0.2 in the univariate analysis or clinically significant,  
21 including age, sex, ethnicity, ICU type, and the SAPS II. In addition to the traditional AUC, net  
22 reclassification improvement (NRI) and integrated discrimination improvement (IDI) were

1  
2  
3 1 calculated to assess improvements in predictive power after adding the NLR. Subgroup analyses  
4  
5 2 were performed to evaluate whether main diagnosis could influence the results. A  $p < 0.05$  was  
6  
7  
8 3 considered statistically significant.  
9

#### 10 4 **Patient and Public Involvement**

11  
12  
13  
14 5 Patients or the public were not involved in the design, or conduct, or reporting, or dissemination  
15  
16 6 plans of this research.  
17  
18  
19 7

#### 20 8 **RESULTS**

21  
22  
23  
24 9 Between June 2001 and October 2012, a total of 38,597 patients ( $\geq 16$  years) were admitted to the  
25  
26  
27 10 ICU. After the selection criteria were applied, 21,822 patients were included in the final analysis,  
28  
29 11 with a median (interquartile range) age of 66.68 (52.76, 79.55) years; 46.47% were female. The  
30  
31 12 in-hospital mortality rate was 14.43%, while the 90-day and 1-year mortality rates were 20.78%  
32  
33 13 and 28.57%, respectively. The median (interquartile range) lengths of ICU and hospital stay were  
34  
35 14 2.08 (1.21–4.13) and 6.63 (3.79–11.79) days, respectively.  
36  
37  
38

39 15 Based on the in-hospital mortality data, patients were divided into survival and death groups. The  
40  
41 16 baseline characteristics and clinical data are shown in **Table 1**. The death group was older and  
42  
43 17 had more females than the survival group. Compared with overall in-hospital mortality, the  
44  
45 18 mortality rate in the medical ICU (MICU) was significantly higher (14.43% vs. 16.31%,  
46  
47 19 respectively). Blood examinations showed that the WBC count, neutrophil count, NLR, and PLR  
48  
49 20 were significantly higher, whereas the lymphocyte and platelet counts were significantly lower,  
50  
51 21 in the death group.  
52  
53  
54  
55  
56  
57  
58  
59  
60



1 The AUC for all inflammatory markers and their optimal cut-off values are shown in  
2  
3  
4  
5  
6  
7  
8  
9  
10  
11  
12  
13  
14  
15  
16  
17  
18  
19  
20  
21  
22  
23  
24  
25  
26  
27  
28  
29  
30  
31  
32  
33  
34  
35  
36  
37  
38  
39  
40  
41  
42  
43  
44  
45  
46  
47  
48  
49  
50  
51  
52  
53  
54  
55  
56  
57  
58  
59  
60

1 The AUC for all inflammatory markers and their optimal cut-off values are shown in  
2 **Supplemental Table 1**. The NLR had the greatest ability to predict in-hospital mortality (AUC:  
3 0.609;  $p < 0.001$ ). The in-hospital mortality rates for different NLRs are shown in **Supplemental**  
4 **Figure 1**. We found that both a high ( $>6$ ) and low ( $\leq 1$ ) NLR were associated with a higher  
5 mortality rate. Therefore, we selected the NLR as our best inflammatory marker, with cut-off  
6 values of 1 and 6.

7 We further divided patients into three groups based on the NLR—low (NLR  $\leq 1$ ;  $n = 580$ ),  
8 medium ( $1 < \text{NLR} \leq 6$ ;  $n = 10,691$ ), and high (NLR  $> 6$ ;  $n = 10,551$ ) NLR groups—and  
9 compared the clinical outcomes (**Table 2**). The baseline of the three groups were presented in  
10 **Supplemental Table 2**. Compared with the medium NLR group, the low and high NLR groups  
11 were both significantly associated with a poor prognosis. Their in-hospital, 90-day, and 1-year  
12 mortality rates were significantly higher, and the hospital and ICU stays were also significantly  
13 longer.

14 **Table 3** presents the results of the logistic regression analyses for the association between the  
15 NLR and mortality. In the univariate analysis, the NLR was significantly associated with in-  
16 hospital, 90-day, and 1-year mortality. Very high or low NLRs may both be associated with  
17 elevated mortality rates. Similar results were obtained in the multivariate analysis after adjusting  
18 for age, sex, ethnicity, ICU type, and the SAPS II.

19 The predictive value of the NLR was evaluated by calculating the AUC, NRI, and IDI. As shown  
20 in **Figure 1**, the addition of the NLR to the SAPS II significantly improved the AUC from 0.789  
21 (95% confidence interval [CI]: 0.785–0.796) to 0.798 (95% CI: 0.793–0.804;  $p < 0.001$ , DeLong  
22 test). The NRI and IDI for the NLR in relation to the SAPS II were 16.64% ( $p < 0.001$ ) and

1 0.27% ( $p < 0.001$ ), respectively. We also performed a subgroup analysis based on main diagnosis  
2  
3 (Table 4). The prognostic value of the NLR in the subgroups was similar to that of the total,  
4  
5  
6  
7  
8 except for patients with chronic liver disease.  
9

#### 10 **DISCUSSION**

11  
12  
13  
14  
15  
16  
17  
18  
19  
20  
21  
22  
23  
24  
25  
26  
27  
28  
29  
30  
31  
32  
33  
34  
35  
36  
37  
38  
39  
40  
41  
42  
43  
44  
45  
46  
47  
48  
49  
50  
51  
52  
53  
54  
55  
56  
57  
58  
59  
60

5 The main findings of this study are as follows. The NLR had the best predictive ability for in-  
6 hospital mortality in ICU patients. Further analyses based on the NLR revealed that patients with  
7 a high or low NLR were more likely to have higher mortality rates and longer ICU and hospital  
8 stays. The addition of the NLR significantly improved the predictive power of the SAPS II, and  
9 the results of the subgroup analysis based on main diagnosis were consistent with the overall  
10 population.

11 The predictive value of the NLR has been widely studied, particularly in cardiovascular  
12 disease,<sup>[5, 8]</sup> infectious disease,<sup>[7, 9]</sup> and cancer.<sup>[10-11, 13]</sup> Most previous studies<sup>[3-11, 14-15]</sup>  
13 have suggested that the higher the NLR, the worse the prognosis; however, other studies<sup>[16-17]</sup>  
14 have suggested that a low NLR is also associated with a poor prognosis. If, as in previous  
15 studies, we divided patients equally into 3–5 groups based on their NLR, we could draw the  
16 same conclusion that a high NLR is indicative of a poor prognosis. However, before analysis, we  
17 noted that patients with a low NLR also seemed to have a poor prognosis. Thus, we implemented  
18 a different grouping scheme and confirmed our hypothesis by further analysis. Indeed, this  
19 finding was in line with clinical experience: the prognosis is generally good when the clinical  
20 indicators are within the normal range, and values that are too high or low are more likely to be  
21 associated with a poor prognosis. Several studies<sup>[13, 18]</sup> have suggested that the reason why an  
22 elevated NLR leads to a poor prognosis is mainly because of enhanced systemic inflammation

1 and stress responses. However, the reason why a low NLR is associated with a poor prognosis  
2 remains unclear. We speculated that a decreased NLR may be due to a decrease in neutrophils  
3 that play a key role in the innate immune response, including directly killing pathogens by  
4 phagocytosis, releasing a variety of cytokines, and activating T cells, among other roles.<sup>[19]</sup>  
5 Therefore, a reduction in circulating neutrophils can lower the body's response to microbial  
6 invasion. In addition, reduced circulating neutrophils can be ascribed to the increased neutrophil  
7 adhesion to the vascular endothelium, which can cause endothelial damage, leading to leukocyte  
8 aggregation and microvascular thrombosis.<sup>[20]</sup> Thus, the compromise of innate immunity and the  
9 increase in endothelial damage can collectively impair the prognosis of patients.

10 Many previous studies<sup>[3-11, 14-15]</sup> have overlooked the possibility of a low NLR leading to a  
11 poor prognosis, which may be due to several reasons. First, compared to the overall trend  
12 towards a high NLR correlating with a poor prognosis, the association between a low NLR and a  
13 poor prognosis may have been neglected due to the small number of patients. There were only  
14 580 patients with an  $\text{NLR} \leq 1$ , which was 2.66% of the total population. Second, the main  
15 outcome indicators may have influenced the conclusions. Previous studies, which have mostly  
16 focused on late death ( $\geq 5$  days), found that a high NLR can predict a poor prognosis. However,  
17 Riché *et al.*<sup>[17]</sup> reported that a low NLR is associated with an early death ( $< 5$  days), whereas a  
18 high NLR is associated with a late death. Duggal *et al.*<sup>[18]</sup> also suggested that an elevated NLR is  
19 a biomarker for an increased length of ICU stay. Therefore, based on previous studies that  
20 focused on late death, it is reasonable to conclude that a high NLR is associated with increased  
21 mortality. However, in our study, around half of the in-hospital deaths (1,512/3,149; 48.02%)  
22 occurred within 5 days; thus, our study indicated that a low NLR is also associated with

1 increased mortality. Third, the study population may have influenced the conclusions. Several  
2 studies have been conducted in patients with specific diseases,<sup>[11, 13]</sup> and those excluded often  
3 had a low NLR. Our study focused on all ICU patients with no case selection.  
4 Commonly used ICU prognosis score include APACHE, SOFA, SAPS and so on<sup>[21-22]</sup>. In this  
5 study, the SAPS was chosen because of its lack of inflammatory indicators. Although the SAPS  
6 III has better predictive ability,<sup>[23]</sup> there were too many missing values, because it requires  
7 collecting data within 1 h after admission; therefore, we chose to use the SAPS II. Some studies  
8 suggested that the PLR also had the ability to predict mortality<sup>[24]</sup>; therefore, we evaluated the  
9 predictive power of the PLR and found that, despite having some predictive ability, it was not as  
10 effective as the NLR. When we added the PLR to the SAPS II together with the NLR, the AUC  
11 value did not increase significantly; therefore, we did not incorporate the PLR into this model.  
12 Although SAPS II is well-known, it lacks inflammatory indicators. As an easy-to-obtain,  
13 sensitive inflammatory indicator that does not increase the financial burden of patients, NLR has  
14 been reported by many previous studies and has high clinical significance. That's why we tried  
15 to add NLR to the SAPS II to evaluate whether it can increase its predictive performance.  
16 Although the AUC value does not increase very much from a numerical point of view, since this  
17 study is qualitative rather than quantitative, it is enough to illustrate the clinical value of NLR,  
18 and provide a certain reference for the future studies.

19 The major strengths of our study are the large sample size and the inclusion of all ICU patients  
20 without selection bias. Further, we noticed that the mortality rate was also elevated in patients  
21 with a low NLR. More importantly, we found that adding the NLR to the SAPS II could improve

1  
2  
3 1 its predictive power for ICU mortality, which is an important prompt for future scoring systems  
4  
5 2 and may be of particular interest to critical care specialists.  
6  
7

8  
9 3 There are also some limitations to this study. First, this was a retrospective study and some  
10  
11 4 important data may be missing. Some patients were excluded because of missing neutrophil or  
12  
13 5 lymphocyte data, and it was difficult to explore the reasons for missing data based on the  
14  
15 6 information currently available. Second, the conclusions of this study were qualitative rather than  
16  
17 7 quantitative. We can only infer that the addition of the NLR can improve the performance of the  
18  
19 8 SAPS II because the NLR scores cannot be directly included in the SAPS II to construct a new  
20  
21 9 scoring system, however, it has also attracted the attention of clinicians to be wary of abnormal  
22  
23 10 NLR values. Finally, although we conducted a subgroup analysis of different diagnosis, in-depth  
24  
25 11 analyses were not undertaken as it was not the aim of our study.  
26  
27  
28  
29  
30  
31  
32

### 33 **CONCLUSIONS**

34  
35  
36  
37 14 Of the inflammatory markers identified from routine blood tests, the NLR was the best predictor  
38  
39 15 of ICU mortality. Abnormally high or low NLRs were associated with increased mortality.  
40  
41 16 Finally, the addition of the NLR to the SAPS II can improve its predictive power for ICU  
42  
43 17 mortality.  
44  
45  
46  
47  
48  
49  
50  
51  
52  
53  
54  
55  
56  
57  
58  
59  
60

### **Contributorship statement**

XW was fully responsible for all stages of the study, including design, data extraction, statistical analysis, and manuscript writing. FXY and SY was involved in the design of the original protocol. QPL and YNL participated in data curation and analyses. HBW and QL contributed to the discussion and interpretation of data. ZHS helped to draft the final manuscript. All authors read approved the final manuscript.

### **Competing interests**

None declared.

### **Funding**

This work was supported by the National Nature Science Foundation of China, grant number 81870070, and the Innovative Foundation for Graduate Students at Peking Union Medical College, grant number 2019-1002-78.

### **Data sharing statement**

Full data set available from the corresponding author at yanfuxia@sina.com. However, reanalysis of the full data need to be approved by MIMIC III Institute.

## Ethical Statement

Since MIMIC-III is a third-party, anonymized, publicly available database with pre-existing Institutional Review Board approval at BIDMC and MIT, we were exempted from obtaining approval from our institution.

## Acknowledgments

The authors would like to thank the Medical Information Mart for Intensive Care III (MIMIC-III) database version 1.4 (<https://mimic.physionet.org>) for providing open access, and Editage ([www.editage.com](http://www.editage.com)) for their writing support.

## References

1. Adhikari NK, Fowler RA, Bhagwanjee S, Rubenfeld GD. Critical care and the global burden of critical illness in adults. *Lancet* 2010, 376(9749): 1339-1346.
2. Lemeshow S, Le Gall JR. Modeling the severity of illness of ICU patients. A systems update. *JAMA* 1994, 272(13): 1049-1055.
3. Fest J, Ruiter TR, Groot KB, Rizopoulos D, Ikram MA, van Eijck C, et al. The neutrophil-to-lymphocyte ratio is associated with mortality in the general population: The Rotterdam Study. *Eur J Epidemiol* 2019, 34(5): 463-470.
4. Saliccioli JD, Marshall DC, Pimentel MA, Santos MD, Pollard T, Celi LA, et al. The association between the neutrophil-to-lymphocyte ratio and mortality in critical illness: an observational cohort study. *Crit Care* 2015, 19(1): 13.
- [dataset] 5. Sun H, Que J, Peng Y, Ye H, Xiang H, Han Y, et al. The neutrophil-lymphocyte ratio: A promising predictor of mortality in coronary care unit patients - A cohort study. *Int Immunopharmacol* 2019, 74: 105692. <https://doi.org/10.1016/j.intimp.2019.105692>.
6. Yoldas H, Karagoz I, Ogun MN, Velioglu Y, Yildiz I, Bilgi M, et al. Novel Mortality Markers for Critically Ill Patients. *J Intensive Care Med* 2020, 35(4): 383-385.
- [dataset] 7. Ye W, Chen X, Huang Y, Li Y, Xu Y, Liang Z, et al. The association between neutrophil-to-lymphocyte count ratio and mortality in septic patients: a retrospective analysis of the MIMIC-III database. *J Thorac Dis* 2020, 12(5): 1843-1855. <https://doi.org/10.21037/jtd-20-1169>.
8. Kim S, Eliot M, Koestler DC, Wu WC, Kelsey KT. Association of Neutrophil-to-Lymphocyte Ratio With Mortality and Cardiovascular Disease in the Jackson Heart



- 1  
2  
3  
4 Study and Modification by the Duffy Antigen Variant. *Jama Cardiol* 2018, 3(6): 455-  
5  
6 462.  
7  
8  
9 9. Russell CD, Parajuli A, Gale HJ, Bulteel NS, Schuetz P, de Jager CPC, et al. The utility  
10 of peripheral blood leucocyte ratios as biomarkers in infectious diseases: A systematic  
11 review and meta-analysis. *J Infection* 2019, 78(5): 339-348.  
12  
13  
14  
15 10. Valero C, Zanoni DK, McGill MR, Ganly I, Morris LGT, Quer M, et al. Pretreatment  
16 peripheral blood leukocytes are independent predictors of survival in oral cavity cancer.  
17 *Cancer-Am Cancer Soc* 2019, 126(5): 994-1003.  
18  
19  
20  
21 11. Shi M, Zhao W, Zhou F, Chen H, Tang L, Su B, et al. Neutrophil or platelet-to-  
22 lymphocyte ratios in blood are associated with poor prognosis of pulmonary large cell  
23 neuroendocrine carcinoma. *Translational Lung Cancer Research* 2020, 9(1): 45-54.  
24  
25  
26  
27  
28 12. Le Gall JR. A new Simplified Acute Physiology Score (SAPS II) based on a  
29 European/North American multicenter study. *JAMA: The Journal of the American*  
30 *Medical Association* 1993, 270(24): 2957-2963.  
31  
32  
33  
34  
35 13. Gemenetzis G, Bagante F, Griffin JF, Rezaee N, Javed AA, Manos LL, et al. Neutrophil-  
36 to-lymphocyte Ratio is a Predictive Marker for Invasive Malignancy in Intraductal  
37 Papillary Mucinous Neoplasms of the Pancreas. *Ann Surg* 2017, 266(2): 339-345.  
38  
39  
40  
41  
42 14. Karagoz I, Yoldas H. Platelet to lymphocyte and neutrophil to lymphocyte ratios as  
43 strong predictors of mortality in intensive care population. *Rev Assoc Med Bras (1992)*  
44 *2019, 65(5): 633-636.*  
45  
46  
47  
48  
49 15. Ham SY, Yoon HJ, Nam SB, Yun BH, Eum D, Shin CS. Prognostic value of  
50 neutrophil/lymphocyte ratio and mean platelet volume/platelet ratio for 1-year mortality  
51 in critically ill patients. *Sci Rep-Uk* 2020, 10(1).  
52  
53  
54  
55  
56  
57  
58  
59  
60

- 1  
2  
3  
4 16. Hwang SY, Shin TG, Jo IJ, Jeon K, Suh GY, Lee TR, et al. Neutrophil-to-lymphocyte  
5 ratio as a prognostic marker in critically-ill septic patients. *Am J Emerg Med* 2017, 35(2):  
6 234-239.  
7  
8
- 9  
10  
11 17. Riché F, Gayat E, Barthélémy R, Le Dorze M, Matéo J, Payen D. Reversal of neutrophil-  
12 to-lymphocyte count ratio in early versus late death from septic shock. *Crit Care* 2015,  
13 19(1).  
14  
15
- 16  
17  
18 18. Duggal NA, Snelson C, Shaheen U, Pearce V, Lord JM. Innate and adaptive immune  
19 dysregulation in critically ill ICU patients. *Sci Rep-Uk* 2018, 8(1).  
20  
21
- 22  
23 19. Uhl B, Vadlau Y, Zuchtriegel G, Nekolla K, Sharaf K, Gaertner F, et al. Aged neutrophils  
24 contribute to the first line of defense in the acute inflammatory response. *Blood* 2016,  
25 128(19): 2327-2337.  
26  
27
- 28  
29  
30 20. Entman ML, Youker K, Shappell SB, Siegel C, Rothlein R, Dreyer WJ, et al. Neutrophil  
31 adherence to isolated adult canine myocytes. Evidence for a CD18-dependent  
32 mechanism. *J Clin Invest* 1990, 85(5): 1497-1506.  
33  
34
- 35  
36  
37 21. Sinto R, Suwanto S, Lie KC, Harimurti K, Widodo D, Pohan HT. Prognostic accuracy  
38 of the quick Sequential Organ Failure Assessment (qSOFA)-lactate criteria for mortality  
39 in adults with suspected bacterial infection in the emergency department of a hospital  
40 with limited resources. *Emerg Med J* 2020, 37(6): 363-369.  
41  
42
- 43  
44  
45 22. Kalichsztein M, Nobre G, Kezen J, Braga F, Kurtz P, Penna G, et al. Using outcome  
46 prediction tools in the ICU: performance of APACHE II and SAPS 2 scores in clinical  
47 patients. *Crit Care* 2006, 10(1): P407.  
48  
49
- 50  
51  
52 23. Polzik P, Grøndal O, Tavenier J, Madsen MB, Andersen O, Hedetoft M, et al. SuPAR  
53 correlates with mortality and clinical severity in patients with necrotizing soft-tissue  
54  
55  
56  
57

1  
2  
3  
4 infections: results from a prospective, observational cohort study. Sci Rep-Uk 2019, 9(1).  
5  
6 [dataset] 24. Shen Y, Huang X, Zhang W. Platelet-to-lymphocyte ratio as a prognostic  
7  
8 predictor of mortality for sepsis: interaction effect with disease severity-a retrospective  
9  
10 study. Bmj Open 2019, 9(1): e22896. <https://doi.org/10.1136/bmjopen-2018-022896>  
11  
12  
13  
14  
15  
16  
17  
18  
19  
20  
21  
22  
23  
24  
25  
26  
27  
28  
29  
30  
31  
32  
33  
34  
35  
36  
37  
38  
39  
40  
41  
42  
43  
44  
45  
46  
47  
48  
49  
50  
51  
52  
53  
54  
55  
56  
57  
58  
59  
60

For peer review only

## Tables

**Table 1 Baseline characteristics according to survivors and death**

|                                 | <b>Overall<br/>(n=21,822)</b> | <b>Survival group<br/>(n=18,673)</b> | <b>Death group<br/>(n=3,149)</b> | <b>P</b> |
|---------------------------------|-------------------------------|--------------------------------------|----------------------------------|----------|
| Age, years                      | 66.68 (52.76, 79.55)          | 65.37 (51.65, 78.41)                 | 75.05 (61.16, 83.58)             | <0.001   |
| Sex, n (%)                      |                               |                                      |                                  | 0.004    |
| Female                          | 10,140 (46.47)                | 8,602 (46.07)                        | 1,538 (48.84)                    |          |
| Male                            | 11,682 (53.53)                | 10,071 (53.93)                       | 1,611 (51.16)                    |          |
| Ethnicity, n (%)                |                               |                                      |                                  | <0.001   |
| White                           | 15,875 (72.75)                | 13,619 (72.93)                       | 2,256 (71.64)                    |          |
| Black                           | 2,080 (9.53)                  | 1,857 (9.94)                         | 223 (7.08)                       |          |
| Other                           | 3,867 (17.72)                 | 3,197 (17.12)                        | 670 (21.28)                      |          |
| ICU type                        |                               |                                      |                                  | <0.001   |
| CCU                             | 3,331 (15.26)                 | 2,864 (15.34)                        | 467 (14.83)                      |          |
| CSRU                            | 2,443 (11.20)                 | 2,279 (12.20)                        | 164 (5.21)                       |          |
| MICU                            | 10,411 (47.71)                | 8,713 (46.66)                        | 1,698 (53.92)                    |          |
| SICU                            | 3,775 (17.30)                 | 3,201 (17.14)                        | 574 (18.23)                      |          |
| TSICU                           | 1,862 (8.53)                  | 1,616 (8.65)                         | 246 (7.81)                       |          |
| SAPS II                         | 34 (25, 43)                   | 32 (24, 40)                          | 48 (37.5, 60)                    | <0.001   |
| Peripheral blood index          |                               |                                      |                                  |          |
| WBC (10 <sup>9</sup> /L)        | 9.9 (7.1, 13.9)               | 9.7 (7.1, 13.6)                      | 11.4 (7.6, 16.6)                 | <0.001   |
| Lymphocyte (10 <sup>9</sup> /L) | 1.30 (0.83, 1.91)             | 1.34 (0.87, 1.94)                    | 1.06 (0.67, 1.62)                | <0.001   |
| Neutrophil (10 <sup>9</sup> /L) | 7.56 (4.88, 11.45)            | 7.34 (4.82, 11.07)                   | 9.16 (5.49, 13.60)               | <0.001   |
| Platelet (10 <sup>9</sup> /L)   | 208 (150, 275)                | 210 (155, 275)                       | 192 (119, 277)                   | <0.001   |
| NLR                             | 5.75 (3.09, 11.13)            | 5.40 (2.95, 10.46)                   | 8.32 (4.25, 14.75)               | <0.001   |
| PLR                             | 177.9 (115.4, 287.4)          | 175.1 (115.1, 280.0)                 | 199.1 (117.8, 334.9)             | <0.001   |

Data are presented as median and interquartile range or number and percentage.

ICU, intensive care unit; CCU, coronary care unit; CSRU, cardiac surgery recovery units; MICU, medical ICU; SICU, surgical ICU; TSICU trauma surgical ICU; SAPS, Simplified Acute Physiology Score; WBC, white blood cell; NLR, neutrophil-to-lymphocyte ratio; PLR, platelet-to-lymphocyte ratio.

**Table 2 Clinical outcomes of the ICU patients**

| Clinical outcomes           | Overall<br>(n=21822) | NLR                |                    |                    | P      |
|-----------------------------|----------------------|--------------------|--------------------|--------------------|--------|
|                             |                      | ≤1 (n=580)         | (1, 6] (n=10691)   | > 6 (n=10,551)     |        |
| Hospital mortality, n (%)   | 3149 (14.43)         | 122 (21.03)        | 1,009 (9.44)       | 2,018 (19.13)      | <0.001 |
| 90-Day mortality, n (%)     | 4534 (20.78)         | 155 (26.72)        | 1,511 (14.13)      | 2,868 (27.18)      | <0.001 |
| 1-Year mortality, n (%)     | 6234 (28.57)         | 211 (36.38)        | 2,311 (21.62)      | 3,712 (35.18)      | <0.001 |
| ICU length of stay (d)      | 2.08 (1.21, 4.13)    | 2.04 (1.08, 4.38)  | 1.96 (1.13, 3.46)  | 2.38 (1.33, 5.04)  | <0.001 |
| Hospital length of stay (d) | 6.63 (3.79, 11.79)   | 7.35 (3.34, 15.86) | 6.08 (3.63, 10.79) | 7.00 (3.96, 12.67) | <0.001 |

Data are presented as median and interquartile range or number and percentage.

**Table 3 Association between NLR and mortality**

| Exposure              | Non-adjusted      |        | Adjusted          |        |
|-----------------------|-------------------|--------|-------------------|--------|
|                       | OR (95%CI)        | P      | OR (95%CI)        | P      |
| In-hospital mortality |                   |        |                   |        |
| ≤1                    | 2.56 (2.07, 3.15) | <0.001 | 1.61 (1.26, 2.05) | <0.001 |
| (1, 6]                | 1                 |        | 1                 |        |
| >6                    | 2.27 (2.09, 2.46) | <0.001 | 1.59 (1.46, 1.74) | <0.001 |
| 90-Day mortality      |                   |        |                   |        |
| ≤1                    | 1.96 (1.65, 2.33) | <0.001 | 1.48 (1.18, 1.85) | <0.001 |
| (1, 6]                | 1                 |        | 1                 |        |
| >6                    | 2.08 (1.95, 2.22) | <0.001 | 1.60 (1.48, 1.43) | <0.001 |
| 1-Year mortality      |                   |        |                   |        |
| ≤1                    | 2.07 (1.74, 2.47) | <0.001 | 1.51 (1.23, 1.86) | <0.001 |
| (1, 6]                | 1                 |        | 1                 |        |
| >6                    | 1.97 (1.85, 2.09) | <0.001 | 1.38 (1.29, 1.48) | <0.001 |

Adjusted confounders: age, sex, ethnicity, ICU type and SAPS II.

**Table 4 Subgroup analyses of the association between In-hospital mortality and NLR levels.**

| Subgroups |            | NLR                |               |                   |
|-----------|------------|--------------------|---------------|-------------------|
|           |            | ≤ 1                | (1, 6]        | >6                |
| ARDS      | n (%)      | 46 (1.88)          | 1,812 (74.17) | 585 (23.95)       |
|           | OR (95%CI) | 1.85 (1.24, 2.76)  | 1             | 1.27 (1.09, 1.49) |
|           | <i>P</i>   | 0.003              |               | 0.002             |
| CHD       | n (%)      | 37 (1.99)          | 765 (41.08)   | 1,060 (56.93)     |
|           | OR (95%CI) | 2.13 (1.12, 4.02)  | 1             | 1.90 (1.54, 2.33) |
|           | <i>P</i>   | 0.021              |               | <0.001            |
| CKD       | n (%)      | 37 (1.99)          | 765 (41.08)   | 1,060 (56.93)     |
|           | OR (95%CI) | 3.62 (1.67, 7.86)  | 1             | 1.78 (1.33, 2.39) |
|           | <i>P</i>   | 0.001              |               | <0.001            |
| CLD       | n (%)      | 37 (1.99)          | 765 (41.08)   | 1,060 (56.93)     |
|           | OR (95%CI) | 1.75 (0.16, 19.43) | 1             | 2.57 (1.12, 5.89) |
|           | <i>P</i>   | 0.648              |               | 0.025             |

Confounders adjustment were performed as before (Table 3).

ARDS acute respiratory distress syndrome, CHD coronary heart disease, CKD chronic kidney disease, CLD chronic liver disease.

## Figure Legends

**Figure 1:** Receiver operating characteristic curves for the SAPS II and the SAPS

II+NLR.

SAPS, Simplified Acute Physiology Score; NLR, Neutrophil-to-Lymphocyte Ratio;

AUC, area under the receiver-operating characteristic curve; IDI, integrated

discrimination improvement; NRI, net reclassification improvement.



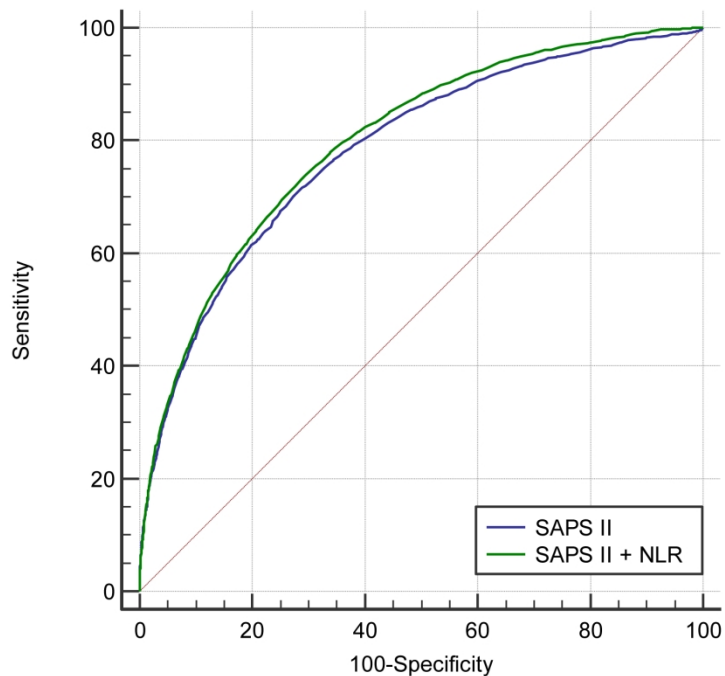

|                               | <b>SAPS II</b> | <b>SAPSII+NLR</b> | <b>P-value</b> |
|-------------------------------|----------------|-------------------|----------------|
| <b>AUC</b>                    | 0.789          | 0.798             | < 0.001        |
| <b>SAPS II vs. SAPSII+NLR</b> |                |                   |                |
| <b>NRI</b>                    |                | 16.64%            | < 0.001        |
| <b>IDI</b>                    |                | 0.27%             | < 0.001        |

Figure 1

**Supplemental Table 1 The optimal cut-off values based on in-hospital mortality**

| <b>Peripheral blood index</b> | <b>Cut-off value</b> | <b>AUC</b> | <b>P</b> |
|-------------------------------|----------------------|------------|----------|
| WBC ( $10^9/L$ )              | 12                   | 0.575      | <0.001   |
| Lymphocyte ( $10^9/L$ )       | 1.17                 | 0.593      | <0.001   |
| Neutrophil ( $10^9/L$ )       | 9.57                 | 0.576      | <0.001   |
| Platelet ( $10^9/L$ )         | 128                  | 0.554      | <0.001   |
| NLR                           | 6                    | 0.609      | <0.001   |
| PLR                           | 267                  | 0.536      | <0.001   |

WBC, white blood cell; NLR, neutrophil-to-lymphocyte ratio; PLR, platelet-to-lymphocyte ratio.

**Supplemental Table 2 Baseline characteristics according to NLR level**

|                                 | NLR                  |                      |                      | <i>P</i> |
|---------------------------------|----------------------|----------------------|----------------------|----------|
|                                 | ≤1 (n=580)           | (1, 6] (n=10691)     | > 6 (n=10,551)       |          |
| Age, years                      | 61.76 (48.02, 74.42) | 64.99 (51.37, 78.06) | 68.75 (54.56, 80.96) | <0.001   |
| Female, n (%)                   | 282 (48.62%)         | 4807 (44.96%)        | 5051 (47.87%)        | <0.001   |
| Ethnicity, n (%)                |                      |                      |                      | <0.001   |
| White                           | 354 (61.03%)         | 7595 (71.04%)        | 7929 (75.12%)        |          |
| Black                           | 115 (19.83%)         | 1250 (11.69%)        | 1846 (17.27)         |          |
| Other                           | 111 (19.14%)         | 1846 (17.27%)        | 1910 (18.10)         |          |
| ICU type                        |                      |                      |                      |          |
| CCU                             | 74 (12.76%)          | 1712 (16.01%)        | 1545 (14.64%)        | 0.005    |
| CSRU                            | 46 (7.93%)           | 1812 (16.95%)        | 585 (5.54%)          | <0.001   |
| MICU                            | 350 (60.34%)         | 4,635 (43.35%)       | 5,426 (51.43%)       | <0.001   |
| SICU                            | 73 (12.59%)          | 1,767 (16.53 %)      | 1,935 (18.34%)       | <0.001   |
| TSICU                           | 37 (6.38%)           | 765 (7.16 %)         | 1,060(10.05%)        | <0.001   |
| SAPS II                         | 43 (31, 61)          | 37 (28, 50)          | 43 (32, 58.75)       | <0.001   |
| Peripheral blood index          |                      |                      |                      |          |
| WBC (10 <sup>9</sup> /L)        | 6.4 (3.1, 11.9)      | 8 (6.1, 10.4)        | 12.8 (9.6, 17.1)     | <0.001   |
| Lymphocyte (10 <sup>9</sup> /L) | 2.96 (1.31, 4.93)    | 1.76 (1.31, 2.32)    | 0.91 (0.61, 1.25)    | <0.001   |
| Neutrophil (10 <sup>9</sup> /L) | 1.99 (0.48, 3.40)    | 5.44 (3.96, 7.41)    | 10.99 (8.06, 14.83)  | <0.001   |
| Platelet (10 <sup>9</sup> /L)   | 148.5 (67, 219.25)   | 202 (147, 266)       | 217 (159, 288)       | <0.001   |

NLR, neutrophil-to-lymphocyte ratio; ICU, intensive care unit; CCU, coronary care unit; CSRU, cardiac surgery recovery units; MICU, medical ICU; SICU, surgical ICU; TSICU trauma surgical ICU; SAPS, Simplified Acute Physiology Score; WBC, white blood cell.

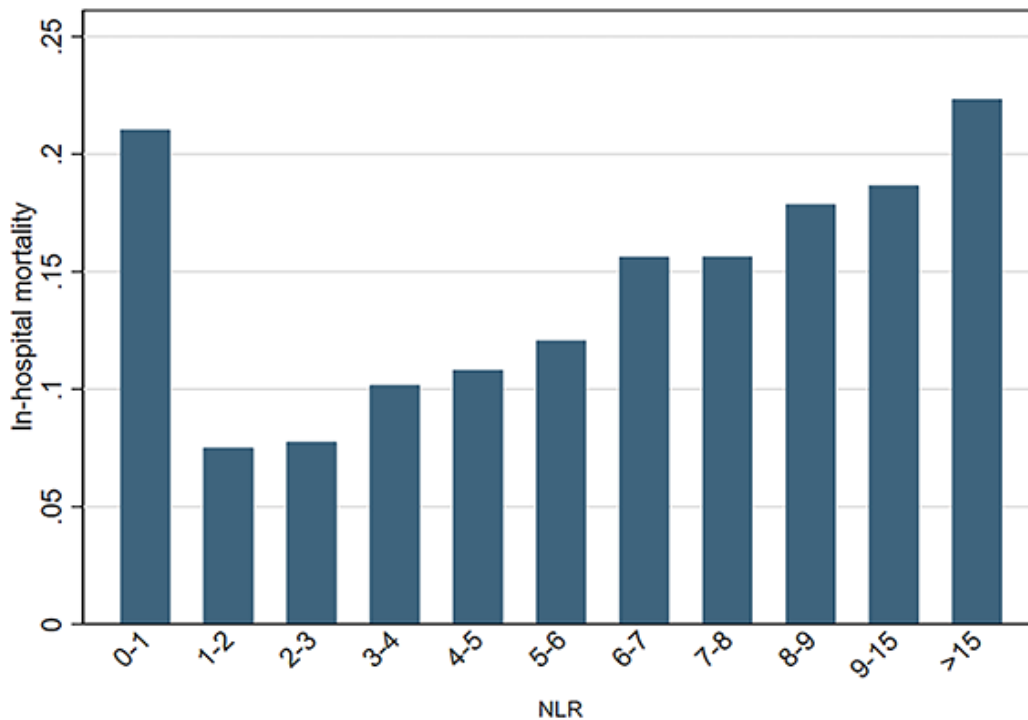

Supplemental Figure 1: Association of in-hospital mortality rates and different NLR levels.

preview only

# BMJ Open

## Neutrophil-to-Lymphocyte Ratio as a Predictor of Mortality in Intensive Care Unit Patients: A Retrospective Analysis of the Medical Information Mart for Intensive Care III Database

|                                 |                                                                                                                                                                                                                                                                                                                                                                                                                                                                                                                                                                                                                                                                                                                                                                                                                                                                                                                                                                                  |
|---------------------------------|----------------------------------------------------------------------------------------------------------------------------------------------------------------------------------------------------------------------------------------------------------------------------------------------------------------------------------------------------------------------------------------------------------------------------------------------------------------------------------------------------------------------------------------------------------------------------------------------------------------------------------------------------------------------------------------------------------------------------------------------------------------------------------------------------------------------------------------------------------------------------------------------------------------------------------------------------------------------------------|
| Journal:                        | <i>BMJ Open</i>                                                                                                                                                                                                                                                                                                                                                                                                                                                                                                                                                                                                                                                                                                                                                                                                                                                                                                                                                                  |
| Manuscript ID                   | bmjopen-2021-053548.R2                                                                                                                                                                                                                                                                                                                                                                                                                                                                                                                                                                                                                                                                                                                                                                                                                                                                                                                                                           |
| Article Type:                   | Original research                                                                                                                                                                                                                                                                                                                                                                                                                                                                                                                                                                                                                                                                                                                                                                                                                                                                                                                                                                |
| Date Submitted by the Author:   | 21-Oct-2021                                                                                                                                                                                                                                                                                                                                                                                                                                                                                                                                                                                                                                                                                                                                                                                                                                                                                                                                                                      |
| Complete List of Authors:       | Wu, Xie; Chinese Academy of Medical Sciences & Peking Union Medical College Fuwai Hospital, Department of Anesthesiology<br>Luo, Qipeng; Peking University Third Hospital, Department of Pain Medicine<br>Su, Zhanhao; Chinese Academy of Medical Sciences & Peking Union Medical College Fuwai Hospital, Department of pediatric cardiac surgery<br>Li, Yanan; Chinese Academy of Medical Sciences & Peking Union Medical College Fuwai Hospital, Department of Anesthesiology<br>Wang, Hongbai; Chinese Academy of Medical Sciences & Peking Union Medical College Fuwai Hospital, Anaesthesiology<br>Liu, Qiao; Chinese Academy of Medical Sciences & Peking Union Medical College Fuwai Hospital, Department of Anesthesiology<br>Yuan, Su; Chinese Academy of Medical Sciences & Peking Union Medical College Fuwai Hospital, Anesthesiology<br>Yan, Fuxia; Chinese Academy of Medical Sciences & Peking Union Medical College Fuwai Hospital, Department of Anesthesiology |
| <b>Primary Subject Heading</b>: | Intensive care                                                                                                                                                                                                                                                                                                                                                                                                                                                                                                                                                                                                                                                                                                                                                                                                                                                                                                                                                                   |
| Secondary Subject Heading:      | Intensive care                                                                                                                                                                                                                                                                                                                                                                                                                                                                                                                                                                                                                                                                                                                                                                                                                                                                                                                                                                   |
| Keywords:                       | Adult intensive & critical care < INTENSIVE & CRITICAL CARE, Adverse events < THERAPEUTICS, Risk management < HEALTH SERVICES ADMINISTRATION & MANAGEMENT                                                                                                                                                                                                                                                                                                                                                                                                                                                                                                                                                                                                                                                                                                                                                                                                                        |
|                                 |                                                                                                                                                                                                                                                                                                                                                                                                                                                                                                                                                                                                                                                                                                                                                                                                                                                                                                                                                                                  |

SCHOLARONE™  
Manuscripts



I, the Submitting Author has the right to grant and does grant on behalf of all authors of the Work (as defined in the below author licence), an exclusive licence and/or a non-exclusive licence for contributions from authors who are: i) UK Crown employees; ii) where BMJ has agreed a CC-BY licence shall apply, and/or iii) in accordance with the terms applicable for US Federal Government officers or employees acting as part of their official duties; on a worldwide, perpetual, irrevocable, royalty-free basis to BMJ Publishing Group Ltd ("BMJ") its licensees and where the relevant Journal is co-owned by BMJ to the co-owners of the Journal, to publish the Work in this journal and any other BMJ products and to exploit all rights, as set out in our [licence](#).

The Submitting Author accepts and understands that any supply made under these terms is made by BMJ to the Submitting Author unless you are acting as an employee on behalf of your employer or a postgraduate student of an affiliated institution which is paying any applicable article publishing charge ("APC") for Open Access articles. Where the Submitting Author wishes to make the Work available on an Open Access basis (and intends to pay the relevant APC), the terms of reuse of such Open Access shall be governed by a Creative Commons licence – details of these licences and which [Creative Commons](#) licence will apply to this Work are set out in our licence referred to above.

Other than as permitted in any relevant BMJ Author's Self Archiving Policies, I confirm this Work has not been accepted for publication elsewhere, is not being considered for publication elsewhere and does not duplicate material already published. I confirm all authors consent to publication of this Work and authorise the granting of this licence.

1  
2  
3  
4 **1 Neutrophil-to-Lymphocyte Ratio as a Predictor of Mortality in Intensive Care Unit**  
5  
6 **2 Patients: A Retrospective Analysis of the Medical Information Mart for Intensive**  
7  
8 **3 Care III Database**

9  
10  
11  
12 4 Xie Wu, M.D.<sup>1</sup>; Qipeng Luo, M.D.<sup>2</sup>; Zhanhao Su, M.D.<sup>3</sup>; Yinan Li, M.D.<sup>1</sup>; Hongbai Wang,  
13  
14 5 M.D.<sup>1</sup>; Qiao Liu, M.D.<sup>1</sup>; Su Yuan, M.D.<sup>1</sup>; and Fuxia Yan, M.D., Ph.D.<sup>1</sup>  
15  
16  
17  
18

19 7 <sup>1</sup>Department of Anesthesiology, Fuwai Hospital, National Center of Cardiovascular  
20  
21 8 Diseases, Chinese Academy of Medical Sciences and Peking Union Medical College,  
22  
23 9 Beijing, China  
24  
25

26 10 <sup>2</sup>Department of Pain Medicine, Peking University Third Hospital, Beijing, China  
27

28 11 <sup>3</sup>Center for Pediatric Cardiac Surgery, Fuwai Hospital, National Center of Cardiovascular  
29  
30 12 Diseases, Chinese Academy of Medical Sciences and Peking Union Medical College,  
31  
32 13 Beijing, China  
33  
34

35 14

36  
37 **15 Corresponding Author:**

38  
39 16 Fuxia Yan, M.D., Ph.D.

40  
41  
42 17 Department of Anesthesiology, Fuwai Hospital, Chinese Academy of Medical Sciences and  
43  
44 18 Peking Union Medical College

45  
46 19 167 Beilishi Road, Xicheng District, Beijing 100037, China

47  
48 20 E-mail: [yanfuxia@sina.com](mailto:yanfuxia@sina.com)  
49  
50

51 21

52  
53 22  
54  
55  
56  
57

1  
2  
3  
4  
5  
6  
7  
8  
9  
10  
11  
12  
13  
14  
15  
16  
17  
18  
19  
20  
21  
22  
23  
24  
25  
26  
27  
28  
29  
30  
31  
32  
33  
34  
35  
36  
37  
38  
39  
40  
41  
42  
43  
44  
45  
46  
47  
48  
49  
50  
51  
52  
53  
54  
55  
56  
57  
58  
59  
60

- 1    **Disclaimers:** The views expressed in the manuscript are our own and not an official
- 2    position of the institution or funder.
- 3
- 4    **Word count:** 2778
- 5    **Number of figures and tables:** Tables (03), Figures (02)

For peer review only



1  
2  
3  
4  
5 **1 Abstract**  
6

7  
8 **2 Objectives:** Identifying high-risk patients in the intensive care unit (ICU) is important  
9  
10 given the high mortality rate. However, existing scoring systems lack easily accessible,  
11  
12 3 given the high mortality rate. However, existing scoring systems lack easily accessible,  
13  
14 4 low-cost, and effective inflammatory markers. We aimed to identify inflammatory markers  
15  
16 5 in routine blood tests to predict mortality in ICU patients and evaluate their predictive  
17  
18 6 power.  
19

20  
21 **7 Design:** Retrospective case-control study.  
22

23  
24 **8 Setting:** Single secondary care centre.  
25

26  
27 **9 Participants:** We analysed data from the Medical Information Mart for Intensive Care III  
28  
29 database. A total of 21,822 ICU patients were enrolled and divided into survival and death  
30  
31 10 database. A total of 21,822 ICU patients were enrolled and divided into survival and death  
32  
33 11 groups based on in-hospital mortality.  
34

35  
36 **12 Primary and secondary outcome measures:** The predictive values of potential  
37  
38 13 inflammatory markers were evaluated and compared using receiver operating characteristic  
39  
40 14 curve analysis. After identifying the neutrophil-to-lymphocyte ratio (NLR) as having the  
41  
42 15 best predictive ability, patients were re-divided into low ( $\leq 1$ ), medium (1–6), and high ( $> 6$ )  
43  
44 16 NLR groups. Univariate and multivariate logistic regression analyses were performed to  
45  
46 17 evaluate the association between the NLR and mortality. The area under the curve (AUC),  
47  
48 18 net reclassification improvement (NRI), and integrated discrimination improvement (IDI)  
49  
50 19 were used to assess whether incorporating the NLR could improve the predictive power of  
51  
52 20 existing scoring systems.  
53  
54  
55  
56  
57

1 **Results:** The NLR had the best predictive ability (AUC: 0.609;  $p < 0.001$ ). In-hospital  
2 mortality rates were significantly higher in the low (odds ratio [OR]: 2.09; 95% confidence  
3 interval [CI]: 1.64–2.66) and high (OR: 1.64; 95% CI: 1.50–1.80) NLR groups than in the  
4 medium NLR group. Adding the NLR to the Simplified Acute Physiology Score II  
5 improved the AUC from 0.789 to 0.798, with an NRI and IDI of 16.64% and 0.27%,  
6 respectively.

7 **Conclusions:** The NLR predicted mortality in ICU patients well. Both low and high NLRs  
8 were associated with elevated mortality rates. Including the NLR may improve the  
9 predictive power of the Simplified Acute Physiology Score II.

#### 11 **Strengths and limitations of this study**

- 12 • This study included a large sample size and avoided selection bias by inclusion of all  
13 ICU patients.
- 14 • This study noticed that the mortality rate was also elevated in patients with a low  
15 NLR.
- 16 • The design was retrospective and important data may be missing; reasons for the  
17 missing data (especially those of neutrophil or lymphocyte counts) were challenging  
18 to determine based on the available information.
- 19 • The conclusions are qualitative rather than quantitative.

## 1 BACKGROUND

2 Patients admitted to the intensive care unit (ICU) are usually severely ill, with high mortality  
3 rates and high hospital costs.<sup>[1]</sup> Therefore, identifying patients with a high risk of mortality is  
4 essential. Existing scoring systems to predict the risk of mortality in the ICU, such as the  
5 Simplified Acute Physiology Score (SAPS) and Acute Physiology and Chronic Health  
6 Evaluation,<sup>[2]</sup> do not include effective inflammatory markers. C-reactive protein and  
7 procalcitonin concentrations are widely recognized as indicators of inflammation; however,  
8 routine testing is not always available for every ICU patient because of cost considerations,  
9 especially for patients without infectious complications. Thus, identifying low-cost, easily  
10 accessible, and effective inflammatory markers may help predict mortality in ICU patients.

11 A blood examination is one of the routine tests conducted for every patient admitted to the ICU.  
12 In addition to total white blood cell (WBC) and differential counts, combined markers, such as  
13 the neutrophil-to-lymphocyte ratio (NLR) and platelet-to-lymphocyte ratio (PLR), have also  
14 attracted much attention in recent years. Numerous studies<sup>[3-11]</sup> have focused on the prognostic  
15 value of inflammatory markers in routine blood tests; however, the most sensitive indicator  
16 remains to be identified. More importantly, in clinical practice, we noted that some patients with  
17 a low NLR have a poor prognosis. However, when examining the literature, we found that  
18 although there are many studies on the NLR,<sup>[3-11]</sup> most of them concluded that a high NLR was  
19 associated with a poor prognosis, but ignored the prognostic value of a low NLR. Therefore, we  
20 conducted this study to verify which indicator is the best inflammatory marker in routine blood  
21 tests and to assess its prognostic value for mortality in ICU patients.

22

## 1       2       3       4       5       6       7       8       9       10       11       12       13       14       15       16       17       18       19       20       21       22       23       24       25       26       27       28       29       30       31       32       33       34       35       36       37       38       39       40       41       42       43       44       45       46       47       48       49       50       51       52       53       54       55       56       57       58       59       60

# 1       **METHODS**

## 2       **Data Sources**

3       Data for this study were obtained from the Medical Information Mart for Intensive Care III  
4       (MIMIC-III) database version 1.4 (<https://mimic.physionet.org>), which is a large, publicly  
5       available database comprising information on >40,000 patients who were admitted to the critical  
6       care unit of Beth Israel Deaconess Medical Center. Restrictions apply to the availability of these  
7       data, which were used under license for this study. Xie Wu completed the Collaborative  
8       Institutional Training Initiative program and was responsible for data extraction (certification  
9       number: 35931746).

## 10       **Participants**

11       All patients who were admitted to the ICU were included. The exclusion criteria were as follows:  
12       (1) patients who are not the first hospitalization; (2) patients younger than 16 years old; (3)  
13       patients who had no blood routine test data within 24h of hospitalization; (4) patients with  
14       abnormal values for key variables. Abnormal values in this study were defined as extreme  
15       outliers, that is WBC count  $>400 \times 10^9/L$ , NLR  $>100$ , and PLR  $>8,000$ . Based on these inclusion  
16       and exclusion criteria, 21,822 patients were finally enrolled for data analysis.

## 17       **Data Extraction**

18       Data from the MIMIC-III database were extracted using structured query language within  
19       PostgreSQL (version 11.2, <https://www.postgresql.org/>). Demographic data, laboratory  
20       parameters, the clinical outcomes of patients, and survival data were collected from all  
21       participants, including data on: age; sex; ethnicity; ICU type; WBC, lymphocyte, neutrophil, and

1 platelet counts; ICU and hospital lengths of stay; in-hospital mortality; and 90-day and 1-year  
2 mortality. Severity at admission was measured using the SAPS II. Laboratory parameters were  
3 assessed during the first 24 h after admission. The NLR and PLR were calculated by dividing the  
4 neutrophil or platelet count by the lymphocyte count. The SAPS II was automatically calculated  
5 in the database according to published scoring criteria.<sup>[12]</sup> Extracted data were presented in  
6 comma-separated value files, linked by identifiers, and integrated into a table using Stata version  
7 15.0 (Stata Corp., TX, USA).

## 8 **Statistical Analyses**

9 Statistical analyses were performed using Stata version 15.0 and MedCalc version 19.0.7  
10 (MedCalc Inc., Mariakerke, Belgium). Continuous variables are presented as medians with  
11 interquartile ranges, and were compared using the Wilcoxon rank sum test or Kruskal–Wallis  
12 test. Categorical variables are presented as frequencies with percentages, and were compared  
13 using the Fisher’s exact test or binomial probability test. Receiver operating characteristic curves  
14 were plotted to calculate the area under the curve (AUC), and were compared using the DeLong  
15 test. Optimal cut-off values for each inflammatory marker were determined using MedCalc  
16 version 19.0.7. Univariate and multivariate logistic regression analyses were performed to  
17 evaluate the prognostic value of the NLR for mortality. In the multivariate analysis, we adjusted  
18 for variables with a *p* value less than 0.2 in the univariate analysis or clinically significant,  
19 including age, sex, ethnicity, ICU type, and the SAPS II. In addition to the traditional AUC, net  
20 reclassification improvement (NRI) and integrated discrimination improvement (IDI) were  
21 calculated to assess improvements in predictive power after adding the NLR. Subgroup analyses

1 were performed to evaluate whether main diagnosis could influence the results. A  $p < 0.05$  was  
2 considered statistically significant.

### 3 **Patient and Public Involvement**

4 Patients or the public were not involved in the design, or conduct, or reporting, or dissemination  
5 plans of this research.

## 7 **RESULTS**

8 Between June 2001 and October 2012, a total of 38,597 patients ( $\geq 16$  years) were admitted to the  
9 ICU. After the selection criteria were applied, 21,822 patients were included in the final analysis.  
10 The flow diagram of this study is presented in **Figure 1**. There were no missing data except for  
11 age (missing for 0.2% of cases,  $n=42$ ), and it was missing at random, so we replaced it with the  
12 mean value. The median (interquartile range) age of these patients was 66.68 (52.76, 79.55)  
13 years, and 46.47% were female. The in-hospital mortality rate was 14.43%, while the 90-day and  
14 1-year mortality rates were 20.78% and 28.57%, respectively. The median (interquartile range)  
15 lengths of ICU and hospital stay were 2.08 (1.21–4.13) and 6.63 (3.79–11.79) days, respectively.  
16 Based on the in-hospital mortality data, patients were divided into survival and death groups. The  
17 baseline characteristics and clinical data are shown in **Table 1**. The death group was older and  
18 had more females than the survival group. Compared with overall in-hospital mortality, the  
19 mortality rate in the medical ICU (MICU) was significantly higher (14.43% vs. 16.31%,  
20 respectively). Blood examinations showed that the WBC count, neutrophil count, NLR, and PLR  
21 were significantly higher, whereas the lymphocyte and platelet counts were significantly lower,  
22 in the death group.

1 The AUC for all inflammatory markers and their optimal cut-off values are shown in  
2  
3  
4  
5  
6  
7  
8  
9  
10  
11  
12  
13  
14  
15  
16  
17  
18  
19  
20  
21  
22  
23  
24  
25  
26  
27  
28  
29  
30  
31  
32  
33  
34  
35  
36  
37  
38  
39  
40  
41  
42  
43  
44  
45  
46  
47  
48  
49  
50  
51  
52  
53  
54  
55  
56  
57  
58  
59  
60

1 The AUC for all inflammatory markers and their optimal cut-off values are shown in  
2 **Supplemental Table 1**. The NLR had the greatest ability to predict in-hospital mortality (AUC:  
3 0.609;  $p < 0.001$ ). The in-hospital mortality rates for different NLRs are shown in **Supplemental**  
4 **Figure 1**. We found that both a high ( $>6$ ) and low ( $\leq 1$ ) NLR were associated with a higher  
5 mortality rate. Therefore, we selected the NLR as our best inflammatory marker, with cut-off  
6 values of 1 and 6.

7 We further divided patients into three groups based on the NLR—low (NLR  $\leq 1$ ;  $n = 580$ ),  
8 medium ( $1 < \text{NLR} \leq 6$ ;  $n = 10,691$ ), and high (NLR  $>6$ ;  $n = 10,551$ ) NLR groups—and  
9 compared the clinical outcomes (**Table 2**). The baseline of the three groups were presented in  
10 **Supplemental Table 2**. Compared with the medium NLR group, the low and high NLR groups  
11 were both significantly associated with a poor prognosis. Their in-hospital, 90-day, and 1-year  
12 mortality rates were significantly higher, and the hospital and ICU stays were also significantly  
13 longer.

14 **Table 3** presents the results of the logistic regression analyses for the association between the  
15 NLR and mortality. In the univariate analysis, the NLR was significantly associated with in-  
16 hospital, 90-day, and 1-year mortality. Very high or low NLRs may both be associated with  
17 elevated mortality rates. Similar results were obtained in the multivariate analysis after adjusting  
18 for age, sex, ethnicity, ICU type, and the SAPS II.

19 The predictive value of the NLR was evaluated by calculating the AUC, NRI, and IDI. As shown  
20 in **Figure 2**, the addition of the NLR to the SAPS II significantly improved the AUC from 0.789  
21 (95% confidence interval [CI]: 0.785–0.796) to 0.798 (95% CI: 0.793–0.804;  $p < 0.001$ , DeLong  
22 test). The NRI and IDI for the NLR in relation to the SAPS II were 16.64% ( $p < 0.001$ ) and

1 0.27% ( $p < 0.001$ ), respectively. We also performed a subgroup analysis based on main diagnosis  
2  
3  
4  
5  
6  
7  
8  
9  
10  
11  
12  
13  
14  
15  
16  
17  
18  
19  
20  
21  
22  
23  
24  
25  
26  
27  
28  
29  
30  
31  
32  
33  
34  
35  
36  
37  
38  
39  
40  
41  
42  
43  
44  
45  
46  
47  
48  
49  
50  
51  
52  
53  
54  
55  
56  
57  
58  
59  
60

1 0.27% ( $p < 0.001$ ), respectively. We also performed a subgroup analysis based on main diagnosis  
2  
3  
4  
5  
6  
7  
8  
9  
10  
11  
12  
13  
14  
15  
16  
17  
18  
19  
20  
21  
22  
23  
24  
25  
26  
27  
28  
29  
30  
31  
32  
33  
34  
35  
36  
37  
38  
39  
40  
41  
42  
43  
44  
45  
46  
47  
48  
49  
50  
51  
52  
53  
54  
55  
56  
57  
58  
59  
60

#### 4 **DISCUSSION**

5 The main findings of this study are as follows. The NLR had the best predictive ability for in-  
6 hospital mortality in ICU patients. Further analyses based on the NLR revealed that patients with  
7 a high or low NLR were more likely to have higher mortality rates and longer ICU and hospital  
8 stays. The addition of the NLR significantly improved the predictive power of the SAPS II, and  
9 the results of the subgroup analysis based on main diagnosis were consistent with the overall  
10 population.

11 The predictive value of the NLR has been widely studied, particularly in cardiovascular  
12 disease,<sup>[5, 8]</sup> infectious disease,<sup>[7, 9]</sup> and cancer.<sup>[10-11, 13]</sup> In this study, among the inflammatory  
13 indicators of the routine blood tests, NLR has the strongest ability to predict in-hospital death.  
14 NLR alone as a predictor has limited predictive power, and its AUC value is only 0.609. This  
15 may be related to that the prognosis of ICU patients are affected by many other confounding  
16 factors. However, after translating NLR into categorical variable and adjusting for the  
17 confounding factors, NLR showed a good ability to predict ICU outcomes. In addition, most  
18 previous studies<sup>[3-11, 14-15]</sup> have suggested that the higher the NLR, the worse the prognosis;  
19 however, other studies<sup>[16-17]</sup> have suggested that a low NLR is also associated with a poor  
20 prognosis. If, as in previous studies, we divided patients equally into 3–5 groups based on their  
21 NLR, we could draw the same conclusion that a high NLR is indicative of a poor prognosis.  
22 However, before analysis, we noted that patients with a low NLR also seemed to have a poor



1 prognosis. Thus, we implemented a different grouping scheme and confirmed our hypothesis by  
2 further analysis. Indeed, this finding was in line with clinical experience: the prognosis is  
3 generally good when the clinical indicators are within the normal range, and values that are too  
4 high or low are more likely to be associated with a poor prognosis. Several studies<sup>[13, 18]</sup> have  
5 suggested that the reason why an elevated NLR leads to a poor prognosis is mainly because of  
6 enhanced systemic inflammation and stress responses. However, the reason why a low NLR is  
7 associated with a poor prognosis remains unclear. We speculated that a decreased NLR may be  
8 due to a decrease in neutrophils that play a key role in the innate immune response, including  
9 directly killing pathogens by phagocytosis, releasing a variety of cytokines, and activating T  
10 cells, among other roles.<sup>[19]</sup> Therefore, a reduction in circulating neutrophils can lower the body's  
11 response to microbial invasion. In addition, reduced circulating neutrophils can be ascribed to the  
12 increased neutrophil adhesion to the vascular endothelium, which can cause endothelial damage,  
13 leading to leukocyte aggregation and microvascular thrombosis.<sup>[20]</sup> Thus, the compromise of  
14 innate immunity and the increase in endothelial damage can collectively impair the prognosis of  
15 patients.

16 Many previous studies<sup>[3-11, 14-15]</sup> have overlooked the possibility of a low NLR leading to a poor  
17 prognosis, which may be due to several reasons. First, compared to the overall trend towards a  
18 high NLR correlating with a poor prognosis, the association between a low NLR and a poor  
19 prognosis may have been neglected due to the small number of patients. There were only 580  
20 patients with an NLR  $\leq 1$ , which was 2.66% of the total population. Second, the main outcome  
21 indicators may have influenced the conclusions. Previous studies, which have mostly focused on  
22 late death ( $\geq 5$  days), found that a high NLR can predict a poor prognosis. However, Riché *et*  
23 *al.*<sup>[17]</sup> reported that a low NLR is associated with an early death ( $< 5$  days), whereas a high NLR

1 is associated with a late death. Duggal *et al.*<sup>[18]</sup> also suggested that an elevated NLR is a  
2 biomarker for an increased length of ICU stay. Therefore, based on previous studies that focused  
3 on late death, it is reasonable to conclude that a high NLR is associated with increased mortality.  
4 However, in our study, around half of the in-hospital deaths (1,512/3,149; 48.02%) occurred  
5 within 5 days; thus, our study indicated that a low NLR is also associated with increased  
6 mortality. Third, the study population may have influenced the conclusions. Several studies have  
7 been conducted in patients with specific diseases,<sup>[11, 13]</sup> and those excluded often had a low NLR.  
8 Our study focused on all ICU patients with no case selection.

9 Commonly used ICU prognosis score include APACHE, SOFA, SAPS and so on<sup>[21-22]</sup>. In this  
10 study, the SAPS was chosen because of its lack of inflammatory indicators. Although the SAPS  
11 III has better predictive ability,<sup>[23]</sup> there were too many missing values, because it requires  
12 collecting data within 1 h after admission; therefore, we chose to use the SAPS II. As an easy-to-  
13 obtain, sensitive inflammatory indicator that does not increase the financial burden of patients,  
14 NLR has been reported by many previous studies and has high clinical significance. That's why  
15 we tried to add NLR to the SAPS II to evaluate whether it can increase its predictive  
16 performance. After adding NLR, the AUC of SAPS II increased from 0.789 to 0.798. Although  
17 the AUC value increase is statistically different, the increase is very small. Therefore, in order to  
18 illustrate the clinical importance of NLR, we also calculated NRI and IDI, and the results  
19 indicated that the addition of NLR significantly improved the prediction ability, with an NRI of  
20 16.64% and IDI of 0.27%, respectively. What's more, some studies suggested that the PLR also  
21 had the ability to predict mortality<sup>[24]</sup>; therefore, we evaluated the predictive power of the PLR  
22 and found that, despite having some predictive ability, it was not as effective as the NLR. When

1 we added the PLR to the SAPS II together with the NLR, the AUC value did not increase  
2 significantly; therefore, we did not incorporate the PLR into this model.

3 The major strengths of our study are the large sample size and the inclusion of all ICU patients  
4 without selection bias. Further, we noticed that the mortality rate was also elevated in patients  
5 with a low NLR. More importantly, we found that adding the NLR to the SAPS II could improve  
6 its predictive power for ICU mortality, which is an important prompt for future scoring systems  
7 and may be of particular interest to critical care specialists.

8 There are also some limitations to this study. First, this was a retrospective study and some  
9 important data may be missing. Some patients were excluded because of missing neutrophil or  
10 lymphocyte data, and it was difficult to explore the reasons for missing data based on the  
11 information currently available. Second, the conclusions of this study were qualitative rather than  
12 quantitative. We can only infer that the addition of the NLR can improve the performance of the  
13 SAPS II because the NLR scores cannot be directly included in the SAPS II to construct a new  
14 scoring system, however, creating a new prognostic model is not a goal of this study, the main  
15 purpose of this study was to attract the attention of clinicians to be wary of abnormal NLR  
16 values. Finally, although we conducted a subgroup analysis of different diagnosis, in-depth  
17 analyses were not undertaken as it was not the aim of our study.

18

## 19 **CONCLUSIONS**

20 Of the inflammatory markers identified from routine blood tests, the NLR was the best predictor  
21 of ICU mortality. Abnormally high or low NLRs were associated with increased mortality.

1  
2  
3  
4  
5  
6  
7  
8  
9  
10  
11  
12  
13  
14  
15  
16  
17  
18  
19  
20  
21  
22  
23  
24  
25  
26  
27  
28  
29  
30  
31  
32  
33  
34  
35  
36  
37  
38  
39  
40  
41  
42  
43  
44  
45  
46  
47  
48  
49  
50  
51  
52  
53  
54  
55  
56  
57  
58  
59  
60

1 Finally, the addition of the NLR to the SAPS II can improve its predictive power for ICU  
2 mortality.

3

For peer review only

### **Contributorship statement**

XW was fully responsible for all stages of the study, including design, data extraction, statistical analysis, and manuscript writing. FXY and SY was involved in the design of the original protocol. QPL and YNL participated in data curation and analyses. HBW and QL contributed to the discussion and interpretation of data. ZHS helped to draft the final manuscript. All authors read approved the final manuscript.

### **Competing interests**

None declared.

### **Funding**

This work was supported by the National Nature Science Foundation of China, grant number 81870070, and the Innovative Foundation for Graduate Students at Peking Union Medical College, grant number 2019-1002-78.

### **Data sharing statement**

Full data set available from the corresponding author at yanfuxia@sina.com. However, reanalysis of the full data need to be approved by MIMIC III Institute.

## Ethical Statement

Since MIMIC-III is a third-party, anonymized, publicly available database with pre-existing Institutional Review Board approval at BIDMC and MIT, we were exempted from obtaining approval from our institution.

## Acknowledgments

The authors would like to thank the Medical Information Mart for Intensive Care III (MIMIC-III) database version 1.4 (<https://mimic.physionet.org>) for providing open access, and Editage ([www.editage.com](http://www.editage.com)) for their writing support.

## References

1. Adhikari NK, Fowler RA, Bhagwanjee S, Rubenfeld GD. Critical care and the global burden of critical illness in adults. *Lancet* 2010, 376(9749): 1339-1346.
2. Lemeshow S, Le Gall JR. Modeling the severity of illness of ICU patients. A systems update. *JAMA* 1994, 272(13): 1049-1055.
3. Fest J, Ruiter TR, Groot KB, Rizopoulos D, Ikram MA, van Eijck C, et al. The neutrophil-to-lymphocyte ratio is associated with mortality in the general population: The Rotterdam Study. *Eur J Epidemiol* 2019, 34(5): 463-470.
4. Saliccioli JD, Marshall DC, Pimentel MA, Santos MD, Pollard T, Celi LA, et al. The association between the neutrophil-to-lymphocyte ratio and mortality in critical illness: an observational cohort study. *Crit Care* 2015, 19(1): 13.
- [dataset] 5. Sun H, Que J, Peng Y, Ye H, Xiang H, Han Y, et al. The neutrophil-lymphocyte ratio: A promising predictor of mortality in coronary care unit patients - A cohort study. *Int Immunopharmacol* 2019, 74: 105692. <https://doi.org/10.1016/j.intimp.2019.105692>.
6. Yoldas H, Karagoz I, Ogun MN, Velioglu Y, Yildiz I, Bilgi M, et al. Novel Mortality Markers for Critically Ill Patients. *J Intensive Care Med* 2020, 35(4): 383-385.
- [dataset] 7. Ye W, Chen X, Huang Y, Li Y, Xu Y, Liang Z, et al. The association between neutrophil-to-lymphocyte count ratio and mortality in septic patients: a retrospective analysis of the MIMIC-III database. *J Thorac Dis* 2020, 12(5): 1843-1855. <https://doi.org/10.21037/jtd-20-1169>.
8. Kim S, Eliot M, Koestler DC, Wu WC, Kelsey KT. Association of Neutrophil-to-Lymphocyte Ratio With Mortality and Cardiovascular Disease in the Jackson Heart

- 1  
2  
3  
4 Study and Modification by the Duffy Antigen Variant. *Jama Cardiol* 2018, 3(6): 455-  
5  
6 462.  
7  
8  
9 9. Russell CD, Parajuli A, Gale HJ, Bulteel NS, Schuetz P, de Jager CPC, et al. The utility  
10 of peripheral blood leucocyte ratios as biomarkers in infectious diseases: A systematic  
11 review and meta-analysis. *J Infection* 2019, 78(5): 339-348.  
12  
13  
14  
15 10. Valero C, Zanoni DK, McGill MR, Ganly I, Morris LGT, Quer M, et al. Pretreatment  
16 peripheral blood leukocytes are independent predictors of survival in oral cavity cancer.  
17 *Cancer-Am Cancer Soc* 2019, 126(5): 994-1003.  
18  
19  
20  
21 11. Shi M, Zhao W, Zhou F, Chen H, Tang L, Su B, et al. Neutrophil or platelet-to-  
22 lymphocyte ratios in blood are associated with poor prognosis of pulmonary large cell  
23 neuroendocrine carcinoma. *Translational Lung Cancer Research* 2020, 9(1): 45-54.  
24  
25  
26  
27 12. Le Gall JR. A new Simplified Acute Physiology Score (SAPS II) based on a  
28 European/North American multicenter study. *JAMA: The Journal of the American*  
29 *Medical Association* 1993, 270(24): 2957-2963.  
30  
31  
32  
33 13. Gemenetzi G, Bagante F, Griffin JF, Rezaee N, Javed AA, Manos LL, et al. Neutrophil-  
34 to-lymphocyte Ratio is a Predictive Marker for Invasive Malignancy in Intraductal  
35 Papillary Mucinous Neoplasms of the Pancreas. *Ann Surg* 2017, 266(2): 339-345.  
36  
37  
38  
39 14. Karagoz I, Yoldas H. Platelet to lymphocyte and neutrophil to lymphocyte ratios as  
40 strong predictors of mortality in intensive care population. *Rev Assoc Med Bras (1992)*  
41 *2019, 65(5): 633-636.*  
42  
43  
44  
45 15. Ham SY, Yoon HJ, Nam SB, Yun BH, Eum D, Shin CS. Prognostic value of  
46 neutrophil/lymphocyte ratio and mean platelet volume/platelet ratio for 1-year mortality  
47 in critically ill patients. *Sci Rep-Uk* 2020, 10(1).  
48  
49  
50  
51  
52  
53  
54  
55  
56  
57  
58  
59  
60



16. Hwang SY, Shin TG, Jo IJ, Jeon K, Suh GY, Lee TR, et al. Neutrophil-to-lymphocyte ratio as a prognostic marker in critically-ill septic patients. *Am J Emerg Med* 2017, 35(2): 234-239.
17. Riché F, Gayat E, Barthélémy R, Le Dorze M, Matéo J, Payen D. Reversal of neutrophil-to-lymphocyte count ratio in early versus late death from septic shock. *Crit Care* 2015, 19(1).
18. Duggal NA, Snelson C, Shaheen U, Pearce V, Lord JM. Innate and adaptive immune dysregulation in critically ill ICU patients. *Sci Rep-Uk* 2018, 8(1).
19. Uhl B, Vadlau Y, Zuchtriegel G, Nekolla K, Sharaf K, Gaertner F, et al. Aged neutrophils contribute to the first line of defense in the acute inflammatory response. *Blood* 2016, 128(19): 2327-2337.
20. Entman ML, Youker K, Shappell SB, Siegel C, Rothlein R, Dreyer WJ, et al. Neutrophil adherence to isolated adult canine myocytes. Evidence for a CD18-dependent mechanism. *J Clin Invest* 1990, 85(5): 1497-1506.
21. Sinto R, Suwanto S, Lie KC, Harimurti K, Widodo D, Pohan HT. Prognostic accuracy of the quick Sequential Organ Failure Assessment (qSOFA)-lactate criteria for mortality in adults with suspected bacterial infection in the emergency department of a hospital with limited resources. *Emerg Med J* 2020, 37(6): 363-369.
22. Kalichsztein M, Nobre G, Kezen J, Braga F, Kurtz P, Penna G, et al. Using outcome prediction tools in the ICU: performance of APACHE II and SAPS 2 scores in clinical patients. *Crit Care* 2006, 10(1): P407.
23. Polzik P, Grøndal O, Tavenier J, Madsen MB, Andersen O, Hedetoft M, et al. SuPAR correlates with mortality and clinical severity in patients with necrotizing soft-tissue

1  
2  
3  
4 infections: results from a prospective, observational cohort study. Sci Rep-Uk 2019, 9(1).  
5  
6 [dataset] 24. Shen Y, Huang X, Zhang W. Platelet-to-lymphocyte ratio as a prognostic  
7  
8 predictor of mortality for sepsis: interaction effect with disease severity-a retrospective  
9  
10 study. Bmj Open 2019, 9(1): e22896. <https://doi.org/10.1136/bmjopen-2018-022896>  
11  
12  
13  
14  
15  
16  
17  
18  
19  
20  
21  
22  
23  
24  
25  
26  
27  
28  
29  
30  
31  
32  
33  
34  
35  
36  
37  
38  
39  
40  
41  
42  
43  
44  
45  
46  
47  
48  
49  
50  
51  
52  
53  
54  
55  
56  
57  
58  
59  
60

For peer review only

## Tables

**Table 1 Baseline characteristics according to survivors and death**

|                                 | <b>Overall<br/>(n=21,822)</b> | <b>Survival group<br/>(n=18,673)</b> | <b>Death group<br/>(n=3,149)</b> | <b>P</b> |
|---------------------------------|-------------------------------|--------------------------------------|----------------------------------|----------|
| Age, years                      | 66.68 (52.76, 79.55)          | 65.37 (51.65, 78.41)                 | 75.05 (61.16, 83.58)             | <0.001   |
| Sex, n (%)                      |                               |                                      |                                  | 0.004    |
| Female                          | 10,140 (46.47)                | 8,602 (46.07)                        | 1,538 (48.84)                    |          |
| Male                            | 11,682 (53.53)                | 10,071 (53.93)                       | 1,611 (51.16)                    |          |
| Ethnicity, n (%)                |                               |                                      |                                  | <0.001   |
| White                           | 15,875 (72.75)                | 13,619 (72.93)                       | 2,256 (71.64)                    |          |
| Black                           | 2,080 (9.53)                  | 1,857 (9.94)                         | 223 (7.08)                       |          |
| Other                           | 3,867 (17.72)                 | 3,197 (17.12)                        | 670 (21.28)                      |          |
| ICU type                        |                               |                                      |                                  | <0.001   |
| CCU                             | 3,331 (15.26)                 | 2,864 (15.34)                        | 467 (14.83)                      |          |
| CSRU                            | 2,443 (11.20)                 | 2,279 (12.20)                        | 164 (5.21)                       |          |
| MICU                            | 10,411 (47.71)                | 8,713 (46.66)                        | 1,698 (53.92)                    |          |
| SICU                            | 3,775 (17.30)                 | 3,201 (17.14)                        | 574 (18.23)                      |          |
| TSICU                           | 1,862 (8.53)                  | 1,616 (8.65)                         | 246 (7.81)                       |          |
| SAPS II                         | 34 (25, 43)                   | 32 (24, 40)                          | 48 (37.5, 60)                    | <0.001   |
| Peripheral blood index          |                               |                                      |                                  |          |
| WBC (10 <sup>9</sup> /L)        | 9.9 (7.1, 13.9)               | 9.7 (7.1, 13.6)                      | 11.4 (7.6, 16.6)                 | <0.001   |
| Lymphocyte (10 <sup>9</sup> /L) | 1.30 (0.83, 1.91)             | 1.34 (0.87, 1.94)                    | 1.06 (0.67, 1.62)                | <0.001   |
| Neutrophil (10 <sup>9</sup> /L) | 7.56 (4.88, 11.45)            | 7.34 (4.82, 11.07)                   | 9.16 (5.49, 13.60)               | <0.001   |
| Platelet (10 <sup>9</sup> /L)   | 208 (150, 275)                | 210 (155, 275)                       | 192 (119, 277)                   | <0.001   |
| NLR                             | 5.75 (3.09, 11.13)            | 5.40 (2.95, 10.46)                   | 8.32 (4.25, 14.75)               | <0.001   |
| PLR                             | 177.9 (115.4, 287.4)          | 175.1 (115.1, 280.0)                 | 199.1 (117.8, 334.9)             | <0.001   |

Data are presented as median and interquartile range or number and percentage.

ICU, intensive care unit; CCU, coronary care unit; CSRU, cardiac surgery recovery units; MICU, medical ICU; SICU, surgical ICU; TSICU trauma surgical ICU; SAPS, Simplified Acute Physiology Score; WBC, white blood cell; NLR, neutrophil-to-lymphocyte ratio; PLR, platelet-to-lymphocyte ratio.

**Table 2 Clinical outcomes of the ICU patients**

| Clinical outcomes           | Overall<br>(n=21822) | NLR                |                    |                    | P      |
|-----------------------------|----------------------|--------------------|--------------------|--------------------|--------|
|                             |                      | ≤1 (n=580)         | (1, 6] (n=10691)   | > 6 (n=10,551)     |        |
| Hospital mortality, n (%)   | 3149 (14.43)         | 122 (21.03)        | 1,009 (9.44)       | 2,018 (19.13)      | <0.001 |
| 90-Day mortality, n (%)     | 4534 (20.78)         | 155 (26.72)        | 1,511 (14.13)      | 2,868 (27.18)      | <0.001 |
| 1-Year mortality, n (%)     | 6234 (28.57)         | 211 (36.38)        | 2,311 (21.62)      | 3,712 (35.18)      | <0.001 |
| ICU length of stay (d)      | 2.08 (1.21, 4.13)    | 2.04 (1.08, 4.38)  | 1.96 (1.13, 3.46)  | 2.38 (1.33, 5.04)  | <0.001 |
| Hospital length of stay (d) | 6.63 (3.79, 11.79)   | 7.35 (3.34, 15.86) | 6.08 (3.63, 10.79) | 7.00 (3.96, 12.67) | <0.001 |

Data are presented as median and interquartile range or number and percentage.

**Table 3 Association between NLR and mortality**

| Exposure              | Non-adjusted      |        | Adjusted          |        |
|-----------------------|-------------------|--------|-------------------|--------|
|                       | OR (95%CI)        | P      | OR (95%CI)        | P      |
| In-hospital mortality |                   |        |                   |        |
| ≤1                    | 2.56 (2.07, 3.15) | <0.001 | 1.61 (1.26, 2.05) | <0.001 |
| (1, 6]                | 1                 |        | 1                 |        |
| >6                    | 2.27 (2.09, 2.46) | <0.001 | 1.59 (1.46, 1.74) | <0.001 |
| 90-Day mortality      |                   |        |                   |        |
| ≤1                    | 1.96 (1.65, 2.33) | <0.001 | 1.48 (1.18, 1.85) | <0.001 |
| (1, 6]                | 1                 |        | 1                 |        |
| >6                    | 2.08 (1.95, 2.22) | <0.001 | 1.60 (1.48, 1.43) | <0.001 |
| 1-Year mortality      |                   |        |                   |        |
| ≤1                    | 2.07 (1.74, 2.47) | <0.001 | 1.51 (1.23, 1.86) | <0.001 |
| (1, 6]                | 1                 |        | 1                 |        |
| >6                    | 1.97 (1.85, 2.09) | <0.001 | 1.38 (1.29, 1.48) | <0.001 |

Adjusted confounders: age, sex, ethnicity, ICU type and SAPS II.

## Figure Legends

**Figure 1:** Study flow diagram in the present study.

ICU, intensive care unit; NLR, Neutrophil-to-Lymphocyte Ratio.

**Figure 2:** Receiver operating characteristic curves for the SAPS II and the SAPS

II+NLR.

SAPS, Simplified Acute Physiology Score; NLR, Neutrophil-to-Lymphocyte Ratio;

AUC, area under the receiver-operating characteristic curve; IDI, integrated

discrimination improvement; NRI, net reclassification improvement.

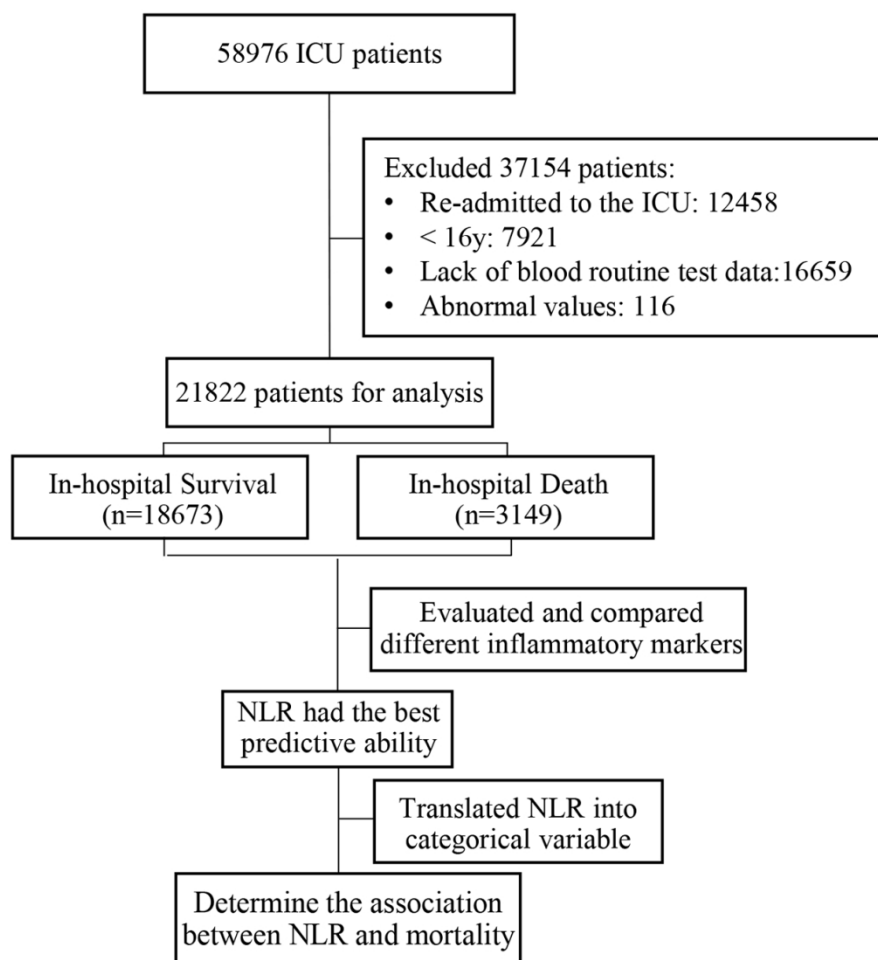

Figure 1

1  
2  
3  
4  
5  
6  
7  
8  
9  
10  
11  
12  
13  
14  
15  
16  
17  
18  
19  
20  
21  
22  
23  
24  
25  
26  
27  
28  
29  
30  
31  
32  
33  
34  
35  
36  
37  
38  
39  
40  
41  
42  
43  
44  
45  
46  
47  
48  
49  
50  
51  
52  
53  
54  
55  
56  
57  
58  
59  
60

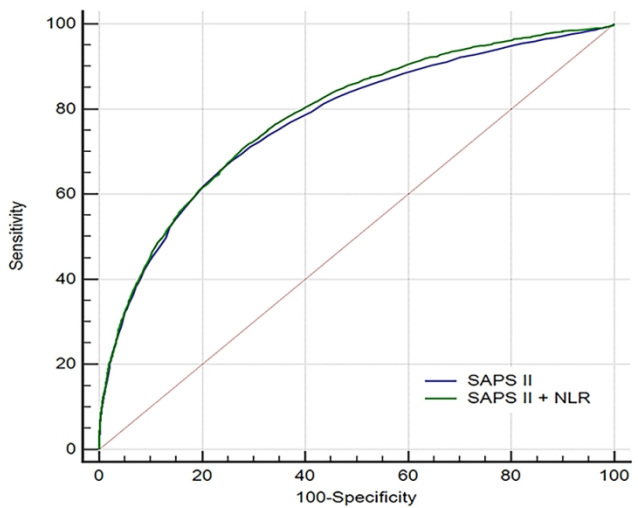

|                               | SAPS II | SAPSII+NLR | P-value |
|-------------------------------|---------|------------|---------|
| AUC                           | 0.789   | 0.798      | < 0.001 |
| <b>SAPS II vs. SAPSII+NLR</b> |         |            |         |
| NRI                           |         | 16.64%     | < 0.001 |
| IDI                           |         | 0.27%      | < 0.001 |

Figure 2



**Supplemental Table 1 The optimal cut-off values based on in-hospital mortality**

| <b>Peripheral blood index</b> | <b>Cut-off value</b> | <b>AUC</b> | <b><i>P</i></b> |
|-------------------------------|----------------------|------------|-----------------|
| WBC ( $10^9/L$ )              | 12                   | 0.575      | <0.001          |
| Lymphocyte ( $10^9/L$ )       | 1.17                 | 0.593      | <0.001          |
| Neutrophil ( $10^9/L$ )       | 9.57                 | 0.576      | <0.001          |
| Platelet ( $10^9/L$ )         | 128                  | 0.554      | <0.001          |
| NLR                           | 6                    | 0.609      | <0.001          |
| PLR                           | 267                  | 0.536      | <0.001          |

WBC, white blood cell; NLR, neutrophil-to-lymphocyte ratio; PLR, platelet-to-lymphocyte ratio.

**Supplemental Table 2 Baseline characteristics according to NLR level**

|                                 | NLR                  |                      |                      | <i>P</i> |
|---------------------------------|----------------------|----------------------|----------------------|----------|
|                                 | ≤1 (n=580)           | (1, 6] (n=10691)     | > 6 (n=10,551)       |          |
| Age, years                      | 61.76 (48.02, 74.42) | 64.99 (51.37, 78.06) | 68.75 (54.56, 80.96) | <0.001   |
| Female, n (%)                   | 282 (48.62%)         | 4807 (44.96%)        | 5051 (47.87%)        | <0.001   |
| Ethnicity, n (%)                |                      |                      |                      | <0.001   |
| White                           | 354 (61.03%)         | 7595 (71.04%)        | 7929 (75.12%)        |          |
| Black                           | 115 (19.83%)         | 1250 (11.69%)        | 1846 (17.27)         |          |
| Other                           | 111 (19.14%)         | 1846 (17.27%)        | 1910 (18.10)         |          |
| ICU type                        |                      |                      |                      |          |
| CCU                             | 74 (12.76%)          | 1712 (16.01%)        | 1545 (14.64%)        | 0.005    |
| CSRU                            | 46 (7.93%)           | 1812 (16.95%)        | 585 (5.54%)          | <0.001   |
| MICU                            | 350 (60.34%)         | 4,635 (43.35%)       | 5,426 (51.43%)       | <0.001   |
| SICU                            | 73 (12.59%)          | 1,767 (16.53 %)      | 1,935 (18.34%)       | <0.001   |
| TSICU                           | 37 (6.38%)           | 765 (7.16 %)         | 1,060(10.05%)        | <0.001   |
| SAPS II                         | 43 (31, 61)          | 37 (28, 50)          | 43 (32, 58.75)       | <0.001   |
| Peripheral blood index          |                      |                      |                      |          |
| WBC (10 <sup>9</sup> /L)        | 6.4 (3.1, 11.9)      | 8 (6.1, 10.4)        | 12.8 (9.6, 17.1)     | <0.001   |
| Lymphocyte (10 <sup>9</sup> /L) | 2.96 (1.31, 4.93)    | 1.76 (1.31, 2.32)    | 0.91 (0.61, 1.25)    | <0.001   |
| Neutrophil (10 <sup>9</sup> /L) | 1.99 (0.48, 3.40)    | 5.44 (3.96, 7.41)    | 10.99 (8.06, 14.83)  | <0.001   |
| Platelet (10 <sup>9</sup> /L)   | 148.5 (67, 219.25)   | 202 (147, 266)       | 217 (159, 288)       | <0.001   |

NLR, neutrophil-to-lymphocyte ratio; ICU, intensive care unit; CCU, coronary care unit; CSRU, cardiac surgery recovery units; MICU, medical ICU; SICU, surgical ICU; TSICU trauma surgical ICU; SAPS, Simplified Acute Physiology Score; WBC, white blood cell.

**Supplemental Table 3 Subgroup analyses of the association between In-hospital mortality and NLR levels.**

| Subgroups | NLR        |                    |               |                   |
|-----------|------------|--------------------|---------------|-------------------|
|           | ≤ 1        | (1, 6]             | >6            |                   |
|           | n (%)      | 46 (1.88)          | 1,812 (74.17) | 585 (23.95)       |
| ARDS      | OR (95%CI) | 1.85 (1.24, 2.76)  | 1             | 1.27 (1.09, 1.49) |
|           | <i>P</i>   | 0.003              |               | 0.002             |
|           | n (%)      | 37 (1.99)          | 765 (41.08)   | 1,060 (56.93)     |
| CHD       | OR (95%CI) | 2.13 (1.12, 4.02)  | 1             | 1.90 (1.54, 2.33) |
|           | <i>P</i>   | 0.021              |               | <0.001            |
|           | n (%)      | 37 (1.99)          | 765 (41.08)   | 1,060 (56.93)     |
| CKD       | OR (95%CI) | 3.62 (1.67, 7.86)  | 1             | 1.78 (1.33, 2.39) |
|           | <i>P</i>   | 0.001              |               | <0.001            |
|           | n (%)      | 37 (1.99)          | 765 (41.08)   | 1,060 (56.93)     |
| CLD       | OR (95%CI) | 1.75 (0.16, 19.43) | 1             | 2.57 (1.12, 5.89) |
|           | <i>P</i>   | 0.648              |               | 0.025             |

Confounders adjustment were performed as before (Table 3).

ARDS acute respiratory distress syndrome, CHD coronary heart disease, CKD chronic kidney disease, CLD chronic liver disease.

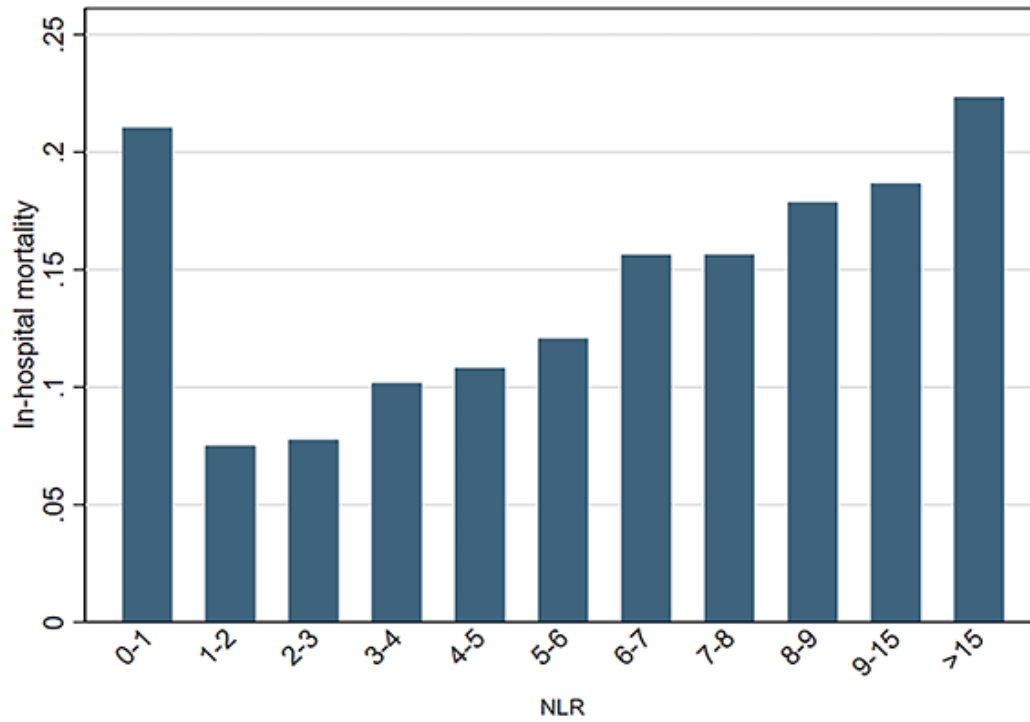

Supplemental Figure 1: Association of in-hospital mortality rates and different NLR levels.
