# Supplementary material for: Neutrophil-to-lymphocyte ratio as a predictor of mortality in intensive care unit patients: a retrospective analysis of the Medical Information Mart for Intensive Care III Database
Source: PubMed Central journal article supplement — BMJ Open. 2021 Nov 11;11(11):e053548. doi: 10.1136/bmjopen-2021-053548 (PMC8587351; doi:10.1136/bmjopen-2021-053548), 2021-11-11
Supplement: bmjopen-2021-053548supp001.pdf [file bmjopen-2021-053548supp001.pdf]

**Supplemental Table 1 The optimal cut-off values based on in-hospital mortality**

| Peripheral blood index          | Cut-off value | AUC   | <i>P</i> |
|---------------------------------|---------------|-------|----------|
| WBC (10 <sup>9</sup> /L)        | 12            | 0.575 | <0.001   |
| Lymphocyte (10 <sup>9</sup> /L) | 1.17          | 0.593 | <0.001   |
| Neutrophil (10 <sup>9</sup> /L) | 9.57          | 0.576 | <0.001   |
| Platelet (10 <sup>9</sup> /L)   | 128           | 0.554 | <0.001   |
| NLR                             | 6             | 0.609 | <0.001   |
| PLR                             | 267           | 0.536 | <0.001   |

WBC, white blood cell; NLR, neutrophil-to-lymphocyte ratio; PLR, platelet-to-lymphocyte ratio.

**Supplemental Table 2 Baseline characteristics according to NLR level**

|                                 | NLR                  |                      |                      | <i>P</i> |
|---------------------------------|----------------------|----------------------|----------------------|----------|
|                                 | ≤1 (n=580)           | (1, 6] (n=10691)     | > 6 (n=10,551)       |          |
| Age, years                      | 61.76 (48.02, 74.42) | 64.99 (51.37, 78.06) | 68.75 (54.56, 80.96) | <0.001   |
| Female, n (%)                   | 282 (48.62%)         | 4807 (44.96%)        | 5051 (47.87%)        | <0.001   |
| Ethnicity, n (%)                |                      |                      |                      | <0.001   |
| White                           | 354 (61.03%)         | 7595 (71.04%)        | 7929 (75.12%)        |          |
| Black                           | 115 (19.83%)         | 1250 (11.69%)        | 1846 (17.27)         |          |
| Other                           | 111 (19.14%)         | 1846 (17.27%)        | 1910 (18.10)         |          |
| ICU type                        |                      |                      |                      |          |
| CCU                             | 74 (12.76%)          | 1712 (16.01%)        | 1545 (14.64%)        | 0.005    |
| CSRU                            | 46 (7.93%)           | 1812 (16.95%)        | 585 (5.54%)          | <0.001   |
| MICU                            | 350 (60.34%)         | 4,635 (43.35%)       | 5,426 (51.43%)       | <0.001   |
| SICU                            | 73 (12.59%)          | 1,767 (16.53 %)      | 1,935 (18.34%)       | <0.001   |
| TSICU                           | 37 (6.38%)           | 765 (7.16 %)         | 1,060(10.05%)        | <0.001   |
| SAPS II                         | 43 (31, 61)          | 37 (28, 50)          | 43 (32, 58.75)       | <0.001   |
| Peripheral blood index          |                      |                      |                      |          |
| WBC (10 <sup>9</sup> /L)        | 6.4 (3.1, 11.9)      | 8 (6.1, 10.4)        | 12.8 (9.6, 17.1)     | <0.001   |
| Lymphocyte (10 <sup>9</sup> /L) | 2.96 (1.31, 4.93)    | 1.76 (1.31, 2.32)    | 0.91 (0.61, 1.25)    | <0.001   |
| Neutrophil (10 <sup>9</sup> /L) | 1.99 (0.48, 3.40)    | 5.44 (3.96, 7.41)    | 10.99 (8.06, 14.83)  | <0.001   |
| Platelet (10 <sup>9</sup> /L)   | 148.5 (67, 219.25)   | 202 (147, 266)       | 217 (159, 288)       | <0.001   |

NLR, neutrophil-to-lymphocyte ratio; ICU, intensive care unit; CCU, coronary care unit; CSRU, cardiac surgery recovery units; MICU, medical ICU; SICU, surgical ICU; TSICU trauma surgical ICU; SAPS, Simplified Acute Physiology Score; WBC, white blood cell.

**Supplemental Table 3 Subgroup analyses of the association between In-hospital mortality and NLR levels.**

| Subgroups |            | NLR                |               |                   |
|-----------|------------|--------------------|---------------|-------------------|
|           |            | ≤ 1                | (1, 6]        | >6                |
| ARDS      | n (%)      | 46 (1.88)          | 1,812 (74.17) | 585 (23.95)       |
|           | OR (95%CI) | 1.85 (1.24, 2.76)  | 1             | 1.27 (1.09, 1.49) |
|           | <i>P</i>   | 0.003              |               | 0.002             |
| CHD       | n (%)      | 37 (1.99)          | 765 (41.08)   | 1,060 (56.93)     |
|           | OR (95%CI) | 2.13 (1.12, 4.02)  | 1             | 1.90 (1.54, 2.33) |
|           | <i>P</i>   | 0.021              |               | <0.001            |
| CKD       | n (%)      | 37 (1.99)          | 765 (41.08)   | 1,060 (56.93)     |
|           | OR (95%CI) | 3.62 (1.67, 7.86)  | 1             | 1.78 (1.33, 2.39) |
|           | <i>P</i>   | 0.001              |               | <0.001            |
| CLD       | n (%)      | 37 (1.99)          | 765 (41.08)   | 1,060 (56.93)     |
|           | OR (95%CI) | 1.75 (0.16, 19.43) | 1             | 2.57 (1.12, 5.89) |
|           | <i>P</i>   | 0.648              |               | 0.025             |

Confounders adjustment were performed as before (Table 3).

ARDS acute respiratory distress syndrome, CHD coronary heart disease, CKD chronic kidney disease, CLD chronic liver disease.

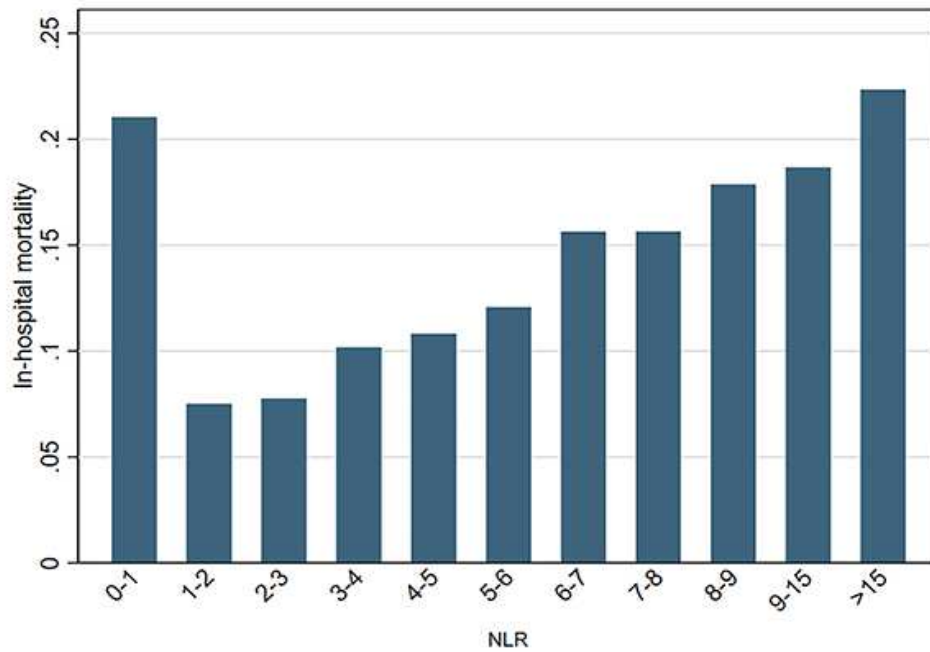

**Supplemental Figure 1: Association of in-hospital mortality rates and different NLR levels.**
